# Supplementary material for: SNP-Based Genetic Structure of Tunisian Durum Wheat Landraces and Distribution of the Resistance to Septoria Tritici Blotch
Source: Research Square preprint supplement (doi:10.21203/rs.3.rs-957863/v1), 2021-11-03
Supplement: Supplementary file 1 [file 25730da3bc5c5b27c10f8d51.xlsx]

## Sheet: Table S1
Table S1. Global Positioning System coordinates, ID of the Tunisian durum wheat accessions and the regions of the different collecting sites provided by The National Gene Bank (BNG)
Accession ID	Localisation/région	Gouvernorat	Longitude	Latitude
14748	Sbikha, Sisseb	Kairouan	10° 21′ 69.4″ E	35° 97′ 19.4″ N
14749	Sbikha, Sisseb	Kairouan	10° 21′ 69.4″ E	35° 97′ 19.4″ N
14753	Sbikha, Sisseb	Kairouan	10° 21′ 69.4″ E	35° 97′ 19.4″ N
14759	Sbikha, Sisseb	Kairouan	10° 21′ 69.4″ E	35° 97′ 19.4″ N
14764	Sbikha, Sisseb	Kairouan	10° 21′ 69.4″ E	35° 97′ 19.4″ N
14767	Sbikha, Sisseb	Kairouan	10° 21′ 69.4″ E	35° 97′ 19.4″ N
14769	Sbikha, Sisseb	Kairouan	10° 21′ 69.4″ E	35° 97′ 19.4″ N
14770	Sbikha, Sisseb	Kairouan	10° 21′ 69.4″ E	35° 97′ 19.4″ N
14771	Sbikha, Sisseb	Kairouan	10° 21′ 69.4″ E	35° 97′ 19.4″ N
14772	Sbikha, Sisseb	Kairouan	10° 21′ 69.4″ E	35° 97′ 19.4″ N
14773	Sbikha, Kondar	Kairouan	10° 18′ 0.4″ E	35° 55′ 57.62″ N
14780	Sbikha, Kondar	Kairouan	10° 18′ 0.4″ E	35° 55′ 57.62″ N
14783	Sbikha, Kondar	Kairouan	10° 18′ 0.4″ E	35° 55′ 57.62″ N
14792	Sbikha, Kondar	Kairouan	10° 18′ 0.4″ E	35° 55′ 57.62″ N
14794	Sbikha, Kondar	Kairouan	10° 18′ 0.4″ E	35° 55′ 57.62″ N
14797	Sbikha, Kondar	Kairouan	10° 18′ 0.4″ E	35° 55′ 57.62″ N
14839	Sbikha, Kondar	Kairouan	10° 18′ 0.4″ E	35° 55′ 57.62″ N
14841	Sbikha, Kondar	Kairouan	10° 18′ 0.4″ E	35° 55′ 57.62″ N
14842	Sbikha, Nadhour	Kairouan	10° 5′ 33.57″ E	36° 7′ 18.58″ N
14843	Sbikha, Nadhour	Kairouan	10° 5′ 33.57″ E	36° 7′ 18.58″ N
14844	Sbikha, Nadhour	Kairouan	10° 5′ 33.57″ E	36° 7′ 18.58″ N
14845	Sbikha, Nadhour	Kairouan	10° 5′ 33.57″ E	36° 7′ 18.58″ N
14846	Menzel Hbib	Gabes	9°36'22.3"E	34°13'34.2"N
14849	Menzel Hbib	Gabes	9°36'22.3"E	34°13'34.2"N
14853	Menzel Hbib	Gabes	9°36'22.3"E	34°13'34.2"N
14857	Menzel Hbib	Gabes	9°36'22.3"E	34°13'34.2"N
14860	Menzel Hbib	Gabes	9°36'22.3"E	34°13'34.2"N
14861	Menzel Hbib	Gabes	9°36'22.3"E	34°13'34.2"N
14864	Menzel Hbib	Gabes	9°36'22.3"E	34°13'34.2"N
14868	Menzel Hbib	Gabes	9°36'22.3"E	34°13'34.2"N
14871	Menzel Hbib	Gabes	9°36'22.3"E	34°13'34.2"N
14873	Menzel Hbib	Gabes	9°36'22.3"E	34°13'34.2"N
14956	Menzel Hbib	Gabes	9°36'22.3"E	34°13'34.2"N
14957	Menzel Hbib	Gabes	9°36'22.3"E	34°13'34.2"N
14964	Menzel Hbib	Gabes	9°36'22.3"E	34°13'34.2"N
15087	Menzel Hbib	Gabes	9°36'22.3"E	34°13'34.2"N
15088	Menzel Hbib	Gabes	9°36'22.3"E	34°13'34.2"N
15102	Menzel Hbib	Gabes	9°36'22.3"E	34°13'34.2"N
15107	Menzel Hbib	Gabes	9°36'22.3"E	34°13'34.2"N
15125	Menzel Hbib	Gabes	9°36'22.3"E	34°13'34.2"N
15129	Menzel Hbib	Gabes	9°36'22.3"E	34°13'34.2"N
15130	Menzel Hbib	Gabes	9°36'22.3"E	34°13'34.2"N
15131	Menzel Hbib	Gabes	9°36'22.3"E	34°13'34.2"N
15132	Menzel Hbib	Gabes	9°36'22.3"E	34°13'34.2"N
15133	Menzel Hbib	Gabes	9°36'22.3"E	34°13'34.2"N
15134	Menzel Hbib	Gabes	9°36'22.3"E	34°13'34.2"N
15135	Menzel Hbib	Gabes	9°36'22.3"E	34°13'34.2"N
15136	Menzel Hbib	Gabes	9°36'22.3"E	34°13'34.2"N
15138	Menzel Hbib	Gabes	9°36'22.3"E	34°13'34.2"N
15139	Menzel Hbib	Gabes	9°36'22.3"E	34°13'34.2"N
15141	Menzel Hbib	Gabes	9°36'22.3"E	34°13'34.2"N
15142	Menzel Hbib	Gabes	9°36'22.3"E	34°13'34.2"N
15168	Elmzaraa, El Hamma	Gabes	9°47'50.3"E	33°53'13.7"N
15169	Elmzaraa, El Hamma	Gabes	9°47'50.3"E	33°53'13.7"N
15171	Elmzaraa, El Hamma	Gabes	9°47'50.3"E	33°53'13.7"N
15441	Ejjoref, Djerba	Mednine	10°43'56.3"E	33°41'38.8"N
15524	Elhnichrate, Zarzis	Mednine	11°04'14.0"E	33°30'19.7"N
15525	Elhnichrate, Zarzis	Mednine	11°04'14.0"E	33°30'19.7"N
15529	Elhnichrate, Zarzis	Mednine	11°04'14.0"E	33°30'19.7"N
15533	Elhnichrate, Zarzis	Mednine	11°04'14.0"E	33°30'19.7"N
15534	Elhnichrate, Zarzis	Mednine	11°04'14.0"E	33°30'19.7"N
15537	Elhnichrate, Zarzis	Mednine	11°04'14.0"E	33°30'19.7"N
15546	Elhnichrate, Zarzis	Mednine	11°04'14.0"E	33°30'19.7"N
15555	Elhnichrate, Zarzis	Mednine	11°04'14.0"E	33°30'19.7"N
15564	Elhnichrate, Zarzis	Mednine	11°04'14.0"E	33°30'19.7"N
15576	Elhnichrate, Zarzis	Mednine	11°04'14.0"E	33°30'19.7"N
15584	Elhnichrate, Zarzis	Mednine	11°04'14.0"E	33°30'19.7"N
15587	Elhnichrate, Zarzis	Mednine	11°04'14.0"E	33°30'19.7"N
15588	Elhnichrate, Zarzis	Mednine	11°04'14.0"E	33°30'19.7"N
15590	Elhnichrate, Zarzis	Mednine	11°04'14.0"E	33°30'19.7"N
15591	Elhnichrate, Zarzis	Mednine	11°04'14.0"E	33°30'19.7"N
15643	Elhnichrate, Zarzis	Mednine	11°04'14.0"E	33°30'19.7"N
15729	Salb, à 10km de Zarzis	Mednine	11°01'03.7"E	33°27'36.7"N
15730	Salb, à 10km de Zarzis	Mednine	11°01'03.7"E	33°27'36.7"N
15732	Salb, à 10km de Zarzis	Mednine	11°01'03.7"E	33°27'36.7"N
15733	Salb, à 10km de Zarzis	Mednine	11°01'03.7"E	33°27'36.7"N
15734	Salb, à 10km de Zarzis	Mednine	11°01'03.7"E	33°27'36.7"N
15902	Route Bou Merdès	Mahdia	10° 43′ 48″ E	35° 27′ 0″ N
15915	Route Bou Merdès	Mahdia	10° 43′ 48″ E	35° 27′ 0″ N
15928	Route Bou Merdès	Mahdia	10° 43′ 48″ E	35° 27′ 0″ N
15929	Route Bou Merdès	Mahdia	10° 43′ 48″ E	35° 27′ 0″ N
15942	Route Bou Merdès	Mahdia	10° 43′ 48″ E	35° 27′ 0″ N
15953	Route Bou Merdès	Mahdia	10° 43′ 48″ E	35° 27′ 0″ N
15954	Route Bou Merdès	Mahdia	10° 43′ 48″ E	35° 27′ 0″ N
15965	Route Bou Merdès	Mahdia	10° 43′ 48″ E	35° 27′ 0″ N
15966	Route Bou Merdès	Mahdia	10° 43′ 48″ E	35° 27′ 0″ N
15971	Route Bou Merdès	Mahdia	10° 43′ 48″ E	35° 27′ 0″ N
15972	Route Bou Merdès	Mahdia	10° 43′ 48″ E	35° 27′ 0″ N
15973	Route Bou Merdès	Mahdia	10° 43′ 48″ E	35° 27′ 0″ N
15974	Route Bou Merdès	Mahdia	10° 43′ 48″ E	35° 27′ 0″ N
16023	Lahkayma (Ouled Dhaouadi)	Mahdia	10°45'39.1"E	35°32'32.6"N
16024	Lahkayma (Ouled Dhaouadi)	Mahdia	10°45'39.1"E	35°32'32.6"N
16057	Elmharza (Ouled el Haj Ennaas)	Mahdia	10° 18′ 57.88″ E	35° 29′ 28.75″ N
16058	Elmharza (Ouled el Haj Ennaas)	Mahdia	10° 18′ 57.88″ E	35° 29′ 28.75″ N
16065	Elmharza (Ouled el Haj Ennaas)	Mahdia	10° 18′ 57.88″ E	35° 29′ 28.75″ N
16066	Elmharza (Ouled el Haj Ennaas)	Mahdia	10° 18′ 57.88″ E	35° 29′ 28.75″ N
16073	Elmharza (Ouled el Haj Ennaas)	Mahdia	10° 18′ 57.88″ E	35° 29′ 28.75″ N
16074	Elmharza (Ouled el Haj Ennaas)	Mahdia	10° 18′ 57.88″ E	35° 29′ 28.75″ N
16078	Elmharza (Ouled el Haj Ennaas)	Mahdia	10° 18′ 57.88″ E	35° 29′ 28.75″ N
16081	Elmharza (Ouled el Haj Ennaas)	Mahdia	10° 18′ 57.88″ E	35° 29′ 28.75″ N
16084	Elmharza (Ouled el Haj Ennaas)	Mahdia	10° 18′ 57.88″ E	35° 29′ 28.75″ N
16085	Elmharza (Ouled el Haj Ennaas)	Mahdia	10° 18′ 57.88″ E	35° 29′ 28.75″ N
16086	Elmharza (Ouled Mansour)	Mahdia	10° 18′ 97.78″ E	35° 49′ 65.75″ N
16087	Henchet el Magroun, Msaken	Sousse	10° 34′ 42.15″ E	35° 43′ 49.76″ N
16088	Henchet el Magroun, Msaken	Sousse	10° 34′ 42.15″ E	35° 43′ 49.76″ N
16091	Henchet el Magroun, Msaken	Sousse	10° 34′ 42.15″ E	35° 43′ 49.76″ N
16092	Henchet el Magroun, Msaken	Sousse	10° 34′ 42.15″ E	35° 43′ 49.76″ N
16095	Henchet el Magroun, Msaken	Sousse	10° 34′ 42.15″ E	35° 43′ 49.76″ N
16096	Henchet el Magroun, Msaken	Sousse	10° 34′ 42.15″ E	35° 43′ 49.76″ N
16100	Henchet el Magroun, Msaken	Sousse	10° 34′ 42.15″ E	35° 43′ 49.76″ N
16103	Henchet el Magroun, Msaken	Sousse	10° 34′ 42.15″ E	35° 43′ 49.76″ N
16104	Henchet el Magroun, Msaken	Sousse	10° 34′ 42.15″ E	35° 43′ 49.76″ N
16105	Sidi El Heni, direction Kairouan	Kairouan	10° 18′ 34.93″ E	35° 40′ 54.56″ N
16106	Sidi El Heni, direction Kairouan	Kairouan	10° 18′ 34.93″ E	35° 40′ 54.56″ N
16113	Sidi El Heni, direction Kairouan	Kairouan	10° 18′ 34.93″ E	35° 40′ 54.56″ N
16114	Sidi El Heni, direction Kairouan	Kairouan	10° 18′ 34.93″ E	35° 40′ 54.56″ N
16145	Sidi El Heni, direction Kairouan	Kairouan	10° 18′ 34.93″ E	35° 40′ 54.56″ N
16146	Sidi El Heni, direction Kairouan	Kairouan	10° 18′ 34.93″ E	35° 40′ 54.56″ N
16154	Sbikha, Sisseb	Kairouan	10° 21′ 69.4″ E	35° 97′ 19.4″ N
16155	Sbikha, Sisseb	Kairouan	10° 21′ 69.4″ E	35° 97′ 19.4″ N
16160	Sbikha, Sisseb	Kairouan	10° 21′ 69.4″ E	35° 97′ 19.4″ N
16161	Sbikha, Sisseb	Kairouan	10° 21′ 69.4″ E	35° 97′ 19.4″ N
16168	Sbikha, Sisseb	Kairouan	10° 21′ 69.4″ E	35° 97′ 19.4″ N
16176	Sbikha, Sisseb	Kairouan	10° 21′ 69.4″ E	35° 97′ 19.4″ N
16178	Sbikha, Sisseb	Kairouan	10° 21′ 69.4″ E	35° 97′ 19.4″ N
16179	Sbikha, Sisseb	Kairouan	10° 21′ 69.4″ E	35° 97′ 19.4″ N
16180	Sbikha, Sisseb	Kairouan	10° 21′ 69.4″ E	35° 97′ 19.4″ N
16181	Sbikha, Sisseb	Kairouan	10° 21′ 69.4″ E	35° 97′ 19.4″ N
16182	Sbikha, Sisseb	Kairouan	10° 21′ 69.4″ E	35° 97′ 19.4″ N
16183	Sbikha, Sisseb	Kairouan	10° 21′ 69.4″ E	35° 97′ 19.4″ N
16184	Sbikha, Sisseb	Kairouan	10° 21′ 69.4″ E	35° 97′ 19.4″ N
16185	El Guefaî, Sbikha	Kairouan	9° 93′ 62.7″ E	35° 97′ 23.8″ N
16186	El Guefaî, Sbikha	Kairouan	9° 93′ 62.7″ E	35° 97′ 23.8″ N
16193	El Guefaî, Sbikha	Kairouan	9° 93′ 62.7″ E	35° 97′ 23.8″ N
16194	El Guefaî, Sbikha	Kairouan	9° 93′ 62.7″ E	35° 97′ 23.8″ N
16206	El Guefaî, Sbikha	Kairouan	9° 93′ 62.7″ E	35° 97′ 23.8″ N
16207	El Guefaî, Sbikha	Kairouan	9° 93′ 62.7″ E	35° 97′ 23.8″ N
16210	El Guefaî, Sbikha	Kairouan	9° 93′ 62.7″ E	35° 97′ 23.8″ N
16211	El Guefaî, Sbikha	Kairouan	9° 93′ 62.7″ E	35° 97′ 23.8″ N
16214	El Guefaî, Sbikha	Kairouan	9° 93′ 62.7″ E	35° 97′ 23.8″ N
16215	El Guefaî, Sbikha	Kairouan	9° 93′ 62.7″ E	35° 97′ 23.8″ N
16216	El Guefaî, Sbikha	Kairouan	9° 93′ 62.7″ E	35° 97′ 23.8″ N
16217	El Guefaî, Sbikha	Kairouan	9° 93′ 62.7″ E	35° 97′ 23.8″ N
16218	El Guefaî, Sbikha	Kairouan	9° 93′ 62.7″ E	35° 97′ 23.8″ N
16220	Sbikha	Kairouan	10° 1′ 12″ E	35° 55′ 48″ N
16231	Sbikha	Kairouan	10° 1′ 12″ E	35° 55′ 48″ N
16244	Sbikha	Kairouan	10° 1′ 12″ E	35° 55′ 48″ N
16245	Sbikha	Kairouan	10° 1′ 12″ E	35° 55′ 48″ N
16255	Sbikha	Kairouan	10° 1′ 12″ E	35° 55′ 48″ N
16256	Sbikha	Kairouan	10° 1′ 12″ E	35° 55′ 48″ N
16267	Sbikha	Kairouan	10° 1′ 12″ E	35° 55′ 48″ N
16268	Sbikha	Kairouan	10° 1′ 12″ E	35° 55′ 48″ N
16278	Sbikha	Kairouan	10° 1′ 12″ E	35° 55′ 48″ N
16288	Sbikha	Kairouan	10° 1′ 12″ E	35° 55′ 48″ N
16297	Sbikha	Kairouan	10° 1′ 12″ E	35° 55′ 48″ N
16369	Aouledkhout, Ara ouali	Gabes	9° 91′ 30″ E	33° 96′ 44″ N
28566	Aouledkhout, Ara ouali	Gabes	9° 91′ 30″ E	33° 96′ 44″ N
28583	-	-	-	-
28590	-	-	-	-
28591	-	-	-	-
28595	-	-	-	-
28596	-	-	-	-
28599	-	-	-	-
28600	-	-	-	-
28601	-	-	-	-
28607	-	-	-	-
28614	-	-	-	-
28615	-	-	-	-
28623	-	-	-	-
28624	-	-	-	-
28635	-	-	-	-
28636	-	-	-	-
28650	-	-	-	-
28651	-	-	-	-
28652	-	-	-	-
28653	-	-	-	-
28656	-	-	-	-
28657	-	-	-	-
28660	-	-	-	-
28661	-	-	-	-
28664	-	-	-	-
28665	-	-	-	-
28668	-	-	-	-
28669	-	-	-	-
28670	-	-	-	-
28671	-	-	-	-
28672	-	-	-	-
28681	-	-	-	-
28682	-	-	-	-
28694	-	-	-	-
28695	-	-	-	-
28708	-	-	-	-
28709	-	-	-	-
28720	-	-	-	-
28721	-	-	-	-
28732	-	-	-	-
28733	-	-	-	-
28746	-	-	-	-
28747	-	-	-	-
28751	-	-	-	-
28752	-	-	-	-
28759	-	-	-	-
28760	-	-	-	-
28769	-	-	-	-
28772	-	-	-	-
28776	-	-	-	-
28777	-	-	-	-
28778	-	-	-	-
28791	-	-	-	-
28973	-	-	-	-
28988	-	-	-	-
28989	-	-	-	-
28995	-	-	-	-
29005	-	-	-	-
29016	-	-	-	-
29017	-	-	-	-
29025	-	-	-	-
29036	-	-	-	-
29037	-	-	-	-
29040	-	-	-	-
29041	-	-	-	-
29042	-	-	-	-
29043	-	-	-	-
29049	-	-	-	-
29057	-	-	-	-
29065	-	-	-	-
29072	-	-	-	-
29073	-	-	-	-
29081	-	-	-	-
29082	-	-	-	-
29091	-	-	-	-
29103	-	-	-	-
29107	-	-	-	-
29108	-	-	-	-
29109	-	-	-	-
29114	-	-	-	-
29115	-	-	-	-
29122	-	-	-	-
29123	-	-	-	-
29130	-	-	-	-
29131	-	-	-	-
29139	-	-	-	-
29140	-	-	-	-
29147	-	-	-	-
29148	-	-	-	-
29152	-	-	-	-
29153	-	-	-	-
29155	-	-	-	-
29164	-	-	-	-
29165	-	-	-	-
29173	-	-	-	-
29182	-	-	-	-
29183	-	-	-	-
29191	-	-	-	-
29199	-	-	-	-
29200	-	-	-	-
29207	-	-	-	-
29208	-	-	-	-
29213	-	-	-	-
29214	-	-	-	-
29215	-	-	-	-
29221	-	-	-	-
29222	-	-	-	-
29230	-	-	-	-
29231	-	-	-	-
29239	-	-	-	-
29240	-	-	-	-
29250	-	-	-	-
29251	-	-	-	-
29260	-	-	-	-
29261	-	-	-	-
29268	-	-	-	-
29269	-	-	-	-
29270	-	-	-	-
29271	-	-	-	-
29287	-	-	-	-
29298	-	-	-	-
29338	-	-	-	-
29339	-	-	-	-
29354	-	-	-	-
29356	-	-	-	-
29370	-	-	-	-
29379	-	-	-	-
29386	-	-	-	-
29396	-	-	-	-
29400	-	-	-	-
29403	-	-	-	-
29404	-	-	-	-
29442	-	-	-	-
29443	-	-	-	-
29449	-	-	-	-
29450	-	-	-	-
29457	-	-	-	-
29458	-	-	-	-
29466	-	-	-	-
29474	-	-	-	-
29476	-	-	-	-
29477	-	-	-	-
29478	-	-	-	-
29479	-	-	-	-
29494	-	-	-	-
29502	-	-	-	-
29512	-	-	-	-
29522	-	-	-	-
29531	-	-	-	-
29542	-	-	-	-
29554	-	-	-	-
29561	-	-	-	-
29562	-	-	-	-
29565	-	-	-	-
29566	-	-	-	-
29567	-	-	-	-
29568	-	-	-	-
29571	-	-	-	-
29572	-	-	-	-
29574	-	-	-	-
29575	-	-	-	-
29576	-	-	-	-
29578	-	-	-	-
29580	-	-	-	-
29581	-	-	-	-
29582	-	-	-	-
29584	-	-	-	-
29585	-	-	-	-
29586	-	-	-	-
29587	-	-	-	-
29588	-	-	-	-
29589	-	-	-	-
29590	-	-	-	-
29591	-	-	-	-
29599	-	-	-	-
29700	-	-	-	-
29702	-	-	-	-
29703	-	-	-	-
29706	-	-	-	-
29714	-	-	-	-
29715	-	-	-	-
29726	-	-	-	-
29727	-	-	-	-
29735	-	-	-	-
29736	-	-	-	-
29745	-	-	-	-
29756	-	-	-	-
49609	-	-	-	-
49617	-	-	-	-
49624	-	-	-	-
49625	-	-	-	-
49629	-	-	-	-
49630	-	-	-	-
49633	-	-	-	-
49641	-	-	-	-
49649	-	-	-	-
49652	-	-	-	-
49653	-	-	-	-
49654	-	-	-	-
49661	-	-	-	-
49668	-	-	-	-
49675	-	-	-	-
49681	-	-	-	-
49687	-	-	-	-
99991	-	-	-	-
99992	-	-	-	-
99993	-	-	-	-
99994	-	-	-	-
99995	-	-	-	-
99996	-	-	-	-

## Sheet: Table S2
Table S2. Origin, year of introduction and selection of Tunisian durum wheat landraces [14, 17, 34]
Landrace-population	Origin and selection
Azizi	Local landrace cultivated mainly in the Center of Tunisia (Msaken) and has various introductions. Though, the origin and history of Azizi landrace remain unclear. Pure line selection started in 1908 by the Botanical Service of Tunis.
Jneh Khotifa	Local landrace from the North of Tunisia (Ain Ghlel and Bouselem regions), also known as Jneh Zarzoura and/or Kahla. Pure line selection started in1908.
Biada	Old local landrace with unknown origin/introduction.
Bidi	This landrace was introduced from Morrocco. According to Bœuf (1926), some lines of Bidi were derived from Huguenot wheat (from Australia). Selection started since 1908 and the commercial spred started in 1913-1914.
Badri	Derived from a cross between Zenati Bouteille and Mahmoudi, made in Tunisia (INRAT) in 1956 and registered in the official Tunisian catalogue of varieties in 1956.
Beskri	Local landrace originatec from Biskra, Algeria. Pure line selection started in 1908. Bœuf has identified 9 botanical varieties of Biskri cultivated in mixture derived from Huguenot wheat or were introduced from Morrocco in 1913. Lines selection started in 1908 and spread commerciallyn in 1915.
Mahmoudi	Mahmoudi is a local old landrace, registered in the official Tunisian catalogue of varieties in 1953. Selection started in 1908. The origin and history of Mahmoudi landrace remain unclear as it has several reported origins/introduction ; from Tunisia, Algeria, Libya (North Africa), Italy and Palestine. Mahmoudi is the most cultivated landrace by farmers in Tunisia. Ben Krima et al (2019) suggeste…
Mekki	Local landrace, cultivated in the North/North-West. It was reported from Morrocco or from Huguenot wheat (from Australia). The Botanical Service of Tunis selected many lines/types of Mekki from 1908 to 1922.
Richi	Very old landrace, discovered in 1908-1909, related to the species Triticum polonicum and was cultivated in the North and the Center of Tunisia. The origin and history of Richi landrace is unclear.
Roussia	Roussia 875 is a local landrace from the north of Tunisia (Bizerte region) that was identified in 1927. Three lineages of Roussia 875 were selected by the Botanical Service of Tunis and then the landrace-population was registered in the official Tunisian catalogue of varieties in 1953.
Souri	Local landrace cultivated mainly in the North of Tunisia (Mateur, Bou Salem, Medjez ElBab). According to the Botanical Service of Tunis, the denomination of the landrace Souri was extended, from 1915, to Sarebouza wheat received from Armenia. Selection started in 1908.
Taganrog	The origin and history of Richi landrace is unclear. Possibly originated from Chypre.
Sbei Glabre	Local landrace with unknown origin/introduction. Selection started in 1908.

## Sheet: Table S3
Table S3. PIC values of the 286 SNPs used to genotype the 366 Tunisian durum wheat accessions
Chromosome	Marker Name	Locus	Position cM	PIC
A Genome
1A	Tdurum_contig44888_837	8	13.7315	0.494137693212706
	Tdurum_contig43475_978	26	21.5494	0.437189552956257
	RAC875_rep_c101110_563	63	29.1114	0.499159111942601
	wsnp_Ex_c7442_12743707	92	36.1552	0.479747636565009
	BobWhite_c2506_332	127	43.2669	0.49665756892528
	wsnp_BF200531A_Ta_2_1	141	43.4679	0.312824619113573
	BobWhite_c48591_394	155	52.5488	0.498180901990426
	Excalibur_rep_c77404_218	188	59.6995	0.34057459025366
	IAAV2888	220	66.3127	0.480752283287935
	IAAV4099	354	73.8035	0.423764172335601
	Tdurum_contig57101_1616	447	81.609	0.419739201476939
	BS00088136_51	491	90.3233	0.410864197530864
	RAC875_rep_c95460_302	516	96.6774	0.465462689020381
	Ex_c4060_510	550	104.145	0.336220877338713
	Excalibur_c63671_90	624	111.552	0.332799150751768
	wsnp_Ex_c30552_39457767	707	118.829	0.301188689196316
	wsnp_Ex_c23143_32377033	715	127.855	0.496326530612245
	RFL_Contig3683_1784	751	133.153	0.427151230482938
	Excalibur_c10538_1153	779	140.929	0.449927896170486
	IAAV2162	793	148.656	0.378936759889141
	tplb0059i08_441	846	155.8	0.402640463592844
	wsnp_Ex_c2918_5381441	858	164.726	0.490306040698606
Mean	-	-	-	0.42611599351565
2A	BS00066770_51	2691	3.46314	0.499995024331021
	Kukri_c30439_2407	2713	6.28204	0.499994960947342
	CAP8_c2783_336	2717	18.5719	0.499994896344762
	RAC875_c2300_1021	2770	27.1982	0.499994896344762
	RAC875_c2965_1689	2776	39.3439	0.499979971158468
	TA002014-1062	2795	48.443	0.499955218979192
	BobWhite_c2022_245	2804	53.1809	0.499955218979192
	BS00023953_51	2806	61.9089	0.499918860805712
	Kukri_c9145_1193	2815	68.4284	0.49991781722551
	Kukri_c17269_1349	2841	77.9105	0.499875608275533
	Tdurum_contig55610_742	2843	77.9105	0.499819740426214
	Excalibur_c22687_1139	2868	86.1127	0.499756192220044
	Tdurum_contig47258_1039	2891	95.7501	0.499749920893344
	IAAV80	3050	104.132	0.499749920893344
	Kukri_c47259_416	3132	114.094	0.499683556821328
	Ku_c69608_894	3179	123.645	0.499679538535491
	CAP7_c1862_460	3228	132.744	0.499679538535491
	wsnp_Ex_c19003_27913936	3261	141.401	0.499679538535491
	Excalibur_c39151_104	3331	150.115	0.499679538535491
	RAC875_c68649_457	3433	156.234	0.499679538535491
	Ku_c68144_972	3451	167.874	0.499679538535491
	Tdurum_contig32203_281	3462	183.767	0.499671268902038
Mean	-	-	-	0.499822286580034
3A	BobWhite_c10098_535	5499	0	0.499815088757396
	Tdurum_contig71521_191	6080	93.0399	0.499995024331021
	Tdurum_contig76296_461	6102	102.678	0.499994960947342
	RAC875_c14054_87	6212	112.881	0.499994896344762
	Kukri_c12079_204	6262	123.006	0.499979971158468
	Excalibur_c26462_452	6290	132.741	0.499979715201428
	Ku_c6126_1140	6305	142.646	0.499979715201428
	BS00041742_51	6324	151.747	0.499955218979192
	RAC875_c45621_398	6332	161.133	0.499955218979192
	RAC875_c20689_270	6340	169.89	0.499953474426443
	Tdurum_contig13011_451	6362	180.325	0.499920889205332
	Tdurum_contig25711_309	6386	188.378	0.499918860805712
Mean	-	-	-	0.49995358619481
4A	RAC875_c90426_151	7669	6.93743	0.5
	IAAV2591	7681	14.3318	0.499995024331021
	Ex_c864_653	7685	25.6643	0.499955218979192
	BS00021752_51	7706	35.3323	0.499920889205332
	tplb0032m13_1358	7742	43.4742	0.499920889205332
	RAC875_c41208_304	7923	52.3591	0.499919884633873
	GENE-2267_428	7941	62.5359	0.499919884633873
	Kukri_c61145_429	7976	71.6619	0.499919884633873
	Kukri_c63460_739	7994	81.0663	0.499918860805712
	Excalibur_c5624_845	8016	91.1944	0.49991781722551
	BobWhite_c10610_149	8040	100.384	0.499874023683547
	GENE-0439_61	8085	110.131	0.499872408619053
	RFL_Contig4686_700	8120	121.668	0.499759239787345
	Kukri_c79627_494	8145	132.947	0.499759239787345
	GENE-4592_471	8220	141.958	0.499759239787345
	CAP8_c710_140	8296	151.158	0.499679538535491
	Excalibur_c34115_1070	8349	164.13	0.499591836734694
	wsnp_Ex_c27294_36502333	8368	179.304	0.499499278961705
	BS00023151_51	8370	207.329	0.499405469678954
Mean	-	-	-	0.499820454169958
5A	BobWhite_c12016_88	9344	6.0797	0.5
	wsnp_Ex_c6209_10838456	9349	8.65818	0.499979971158468
	RFL_Contig2251_1070	9374	15.6886	0.499919884633873
	TA006089-0703	9393	23.458	0.499756192220044
	IAAV7519	9431	32.0183	0.499753086419753
	BS00021873_51	9447	38.7371	0.499679538535491
	tplb0031i04_452	9513	45.3201	0.499679538535491
	wsnp_CAP11_rep_c4151_1963100	9572	52.7999	0.499675443222849
	Tdurum_contig43844_1266	9723	59.2811	0.499596970812726
	wsnp_Ex_c4244_7662955	9757	66.9986	0.499591836734694
	Excalibur_c9210_168	9788	74.762	0.499581269837988
	RAC875_c23340_2243	9816	81.9581	0.499499278961705
	Ex_c4208_839	9885	88.7049	0.499492880035701
	Excalibur_c49550_97	9942	94.497	0.49939027462837
	BS00065343_51	9971	100.902	0.49939027462837
	wsnp_Ex_c16295_24772663	9986	111.2	0.499278961704855
	BobWhite_c17045_186	10001	117.671	0.499159111942601
	BS00022299_51	10013	124.588	0.499159111942601
	wsnp_Ex_rep_c101323_86702546	10052	131.425	0.499148400100781
	BS00065714_51	10058	137.976	0.499148400100781
	BobWhite_c47401_491	10076	147.259	0.499006044869974
	BS00083847_51	10081	148.304	0.499006044869974
Mean	-	-	-	0.499495114358959
6A	BS00003622_51	11731	0.374793	0.5
	BS00071573_51	11750	6.97783	0.499995024331021
	BS00083630_51	11759	13.4528	0.499994960947342
	BS00096853_51	11796	22.0057	0.499979971158468
	wsnp_Ex_rep_c68175_66950387	11837	31.8886	0.499979971158468
	Tdurum_contig27441_373	11856	40.565	0.499979454306377
	BobWhite_c18721_190	11901	43.0971	0.499955218979192
	BS00109886_51	11920	56.8284	0.499919884633873
	Tdurum_contig50698_601	11966	64.8992	0.499875608275533
	BobWhite_c18017_209	11978	71.237	0.499875608275533
	BS00046964_51	12023	73.6142	0.499874023683547
	BobWhite_c8879_142	12053	76.9265	0.499819740426214
	BS00021376_51	12080	80.0975	0.499812695109261
	BS00077448_51	12134	85.0057	0.499749920893344
	Tdurum_contig29974_90	12191	90.5331	0.499683556821328
	BS00058929_51	12254	100.121	0.499596970812726
	RAC875_c1927_197	12297	121.849	0.499596970812726
	BS00029127_51	12337	130.393	0.499586603925732
	BS00011578_51	12419	140.704	0.499505557533325
	D_contig37522_188	12498	153.078	0.499499278961705
	D_contig13913_154	12506	160.498	0.499492880035701
Mean	-	-	-	0.499798757194353
7A	RAC875_c17746_95	13964	6.4334	0.476310839992437
	RAC875_c57584_240	13966	15.0504	0.401858676494152
	Kukri_c18677_955	13969	26.2016	0.384980493509301
	BobWhite_c17904_259	14054	35.6587	0.306158775364898
	BobWhite_c761_293	14100	45.9738	0.423009133151738
	Jagger_c9314_100	14148	53.755	0.48872602557952
	wsnp_CAP11_rep_c4066_1921894	14177	62.7492	0.331836361670974
	BS00063363_51	14190	70.1018	0.424723104021336
	BobWhite_c11354_376	14209	80.6415	0.486287476165362
	Kukri_c6386_2065	14240	90.7524	0.483155744271751
	BS00063555_51	14268	106.809	0.426223230032754
	Excalibur_c62287_128	14277	112.709	0.318482619988257
	BobWhite_c24295_777	14328	120.676	0.481249685059209
	BobWhite_c20374_162	14480	130.273	0.499759239787345
	BobWhite_c53517_181	14712	140.932	0.477909854355146
	BS00065137_51	14757	150.713	0.498880474479794
	BS00009838_51	14780	160.794	0.313911633242356
	BS00085421_51	14808	171.11	0.470868014268728
	BS00053365_51	14828	180.204	0.459950160199359
	Excalibur_c61603_1052	14851	201.781	0.323025156224964
	BS00020236_51	14962	226.072	0.498668054110302
	BS00062749_51	14978	230.397	0.485582057671769
	RAC875_c18668_513	14993	241.404	0.308390022675737
Mean	-	-	-	0.424780297057269
Mean A genome	-	-	-	0.478540927010147
B Genome	-	-	-
1B	Jagger_c5878_119	987	8.36066	0.499994960947342
	BS00023004_51	1007	24.5459	0.499994896344762
	RFL_Contig5906_694	1031	39.4546	0.499980222301333
	BS00063263_51	1089	47.04	0.499979971158468
	Tdurum_contig17609_117	1177	57.7715	0.499979971158468
	TA003238-0490	1531	69.7668	0.499979971158468
	wsnp_Ex_c7447_12751589	1764	79.1263	0.499979715201428
	Kukri_c5336_365	1879	88.5017	0.499955218979192
	BobWhite_c8016_301	1999	99.495	0.499954067102859
	Kukri_c39223_871	2082	110.469	0.499954067102859
	Kukri_c14795_188	2175	120.346	0.499954067102859
	BobWhite_c44460_821	2196	130.899	0.499919884633873
	BobWhite_c9963_51	2250	139.53	0.49991781722551
	Tdurum_contig94450_255	2284	151.414	0.499874023683547
	wsnp_Ku_c40759_48907151	2336	163.855	0.499874023683547
	wsnp_BG274687B_Ta_2_1	2386	173.624	0.499872408619053
	Tdurum_contig97527_318	2394	193.095	0.499819740426214
Mean	-	-	-	0.49994029569587
2B	RAC875_c16881_1400	3650	6.04118	0.499995024331021
	BobWhite_c20346_138	3659	10.3404	0.499995024331021
	BobWhite_c12144_216	3680	19.7204	0.499995024331021
	wsnp_Ex_c3685_6723631	3751	27.1982	0.499994960947342
	wsnp_Ex_c19371_28311667	3769	38.6674	0.499994960947342
	RAC875_c26214_505	3782	47.2174	0.499994896344762
	BS00109268_51	3809	53.7353	0.499979971158468
	Tdurum_contig20987_1271	3813	61.912	0.499979971158468
	RAC875_c4314_993	3821	71.0483	0.499955218979192
	Kukri_rep_c69288_529	3929	80.3721	0.499955218979192
	wsnp_Ex_c12671_20140295	4100	89.3374	0.499954648526077
	wsnp_Ex_c1629_3104356	4278	98.1957	0.499954648526077
	RAC875_c12803_916	4538	107.006	0.499919884633873
	wsnp_Ex_c24135_33382700	4822	115.008	0.499918860805712
	RAC875_c40992_113	4906	126.134	0.499875608275533
	BS00028063_51	4979	134.712	0.499874023683547
	BobWhite_rep_c64004_321	5023	143.874	0.499874023683547
	Tdurum_contig28437_135	5064	152.59	0.499822000711997
	BobWhite_c2822_228	5111	161.405	0.499819740426214
	Kukri_c49784_56	5126	169.304	0.499819740426214
	Tdurum_contig46389_1540	5141	178.229	0.499815088757396
	BS00023025_51	5147	185.666	0.499815088757396
Mean	-	-	-	0.49992289221461
3B	BobWhite_c6016_805	6404	0	0.499980222301333
	wsnp_Ex_c30368_39293103	6446	8.96379	0.499979971158468
	Excalibur_c7321_741	6495	14.1045	0.499979971158468
	Tdurum_contig43938_291	6534	23.3534	0.499979715201428
	BS00059383_51	6563	31.9421	0.499979715201428
	BS00073230_51	6611	40.0457	0.499955218979192
	Excalibur_c39985_68	6625	51.0723	0.499954648526077
	Excalibur_c1806_1251	6695	60.2512	0.499954067102859
	wsnp_Ex_c7172_12318529	6961	68.8699	0.499919884633873
	Excalibur_c34754_108	7136	77.6937	0.499919884633873
	BS00052057_51	7228	86.975	0.499875608275533
	RAC875_c12801_410	7269	95.3887	0.499874023683547
	BS00021992_51	7291	104.52	0.499822000711997
	tplb0046k04_484	7315	112.881	0.499819740426214
	IAAV1677	7327	120.015	0.499819740426214
	BS00038351_51	7354	129.136	0.499819740426214
	RAC875_c34484_67	7413	137.845	0.499819740426214
	BS00036547_51	7485	144.743	0.499817436812853
	Excalibur_c72450_483	7505	182.15	0.499759239787345
Mean	-	-	-	0.499896345782796
4B	Excalibur_c14401_404	8471	1.89526	0.5
	BS00039936_51	8483	6.04222	0.5
	IAAV1120	8486	12.0159	0.499979971158468
	Tdurum_contig46867_597	8499	21.7801	0.499955218979192
	wsnp_Ex_c13357_21054802	8526	29.8787	0.499918860805712
	wsnp_Ex_c37502_45236634	8565	38.2994	0.499918860805712
	wsnp_Ex_c7362_12622736	8596	46.8606	0.499918860805712
	wsnp_Ex_c9440_15657149	8628	55.5453	0.499874023683547
	Ra_c59822_1439	8873	63.1983	0.499759239787345
	Excalibur_c18660_1719	8939	71.4614	0.499753086419753
	Excalibur_c24614_1203	9105	79.464	0.499679538535491
	Tdurum_contig8152_243	9134	87.3295	0.499679538535491
	Tdurum_contig9893_492	9150	95.243	0.49960200862806
	BS00027054_51	9167	102.794	0.499499278961705
	BS00022080_51	9187	112.163	0.49939027462837
	BS00085556_51	9200	118.673	0.499030892765318
	Excalibur_c49297_159	9202	125.199	0.499006044869974
	Tdurum_contig74765_586	9204	141.93	0.499006044869974
	wsnp_Ex_c7059_12151409	9208	148.304	0.498851677571477
	Ku_c2885_1286	9211	170.428	0.498851677571477
Mean	-	-	-	0.499583754969139
5B	Ex_c2571_842	10300	0	0.5
	wsnp_Ex_c56629_58677561	10341	11.7298	0.5
	wsnp_Ex_rep_c110196_92676847	10385	20.2342	0.499995024331021
	wsnp_Ku_c35090_44349517	10412	29.6238	0.499994960947342
	Excalibur_c33031_1755	10464	40.565	0.499994960947342
	IAAV4074	10605	51.1585	0.499994896344762
	Tdurum_contig10338_566	10743	61.8357	0.499979971158468
	BobWhite_c6633_179	10866	71.9496	0.499955218979192
	wsnp_Ku_c3102_5811860	10909	82.9712	0.499954648526077
	Ex_c26924_745	10947	93.436	0.499954067102859
	wsnp_Ex_c29304_38355434	11017	104.232	0.499919884633873
	BS00022673_51	11034	115.688	0.499919884633873
	BS00035963_51	11092	126.024	0.499919884633873
	RFL_Contig4167_1164	11161	135.639	0.499918860805712
	BS00021948_51	11288	147.199	0.499918860805712
	Tdurum_contig81337_335	11323	158.578	0.499875608275533
	wsnp_Ex_c3175_5864594	11350	170.51	0.499875608275533
	BobWhite_c24484_240	11373	182.15	0.499874023683547
	Tdurum_contig59631_111	11435	198.13	0.499822000711997
	Excalibur_rep_c68362_135	11443	206.137	0.499819740426214
	Kukri_c637_517	11466	217.645	0.499819740426214
Mean	-	-	-	0.499928945030912
6B	BobWhite_c18566_106	12690	0.374793	0.499995024331021
	BobWhite_c12846_389	12726	7.79453	0.493427725262688
	Kukri_c3009_1416	12739	13.4528	0.34057459025366
	Excalibur_rep_c84264_67	12762	20.7464	0.471441003124876
	BS00033642_51	12798	32.364	0.394604643803647
	Tdurum_contig11641_1008	12839	40.302	0.499955218979192
	RAC875_c23251_864	12885	50.0729	0.366117409926934
	BS00003214_51	12955	57.9846	0.301188689196316
	Tdurum_contig11126_182	13033	59.1382	0.488165680473373
	BobWhite_c47659_100	13057	61.7794	0.497971520142805
	Tdurum_contig48939_754	13181	65.2199	0.461080374603237
	BS00089580_51	13288	66.7629	0.363605014402207
	Excalibur_c24932_199	13337	71.6438	0.495157470395566
	BS00023050_51	13461	75.7492	0.499591836734694
	Kukri_c84463_474	13498	79.7138	0.317728729085084
	CAP7_c3697_87	13525	85.9623	0.309140330236521
	BobWhite_c3514_717	13541	92.5593	0.48846338727768
	Excalibur_c57840_227	13573	100.131	0.330475885274796
	BobWhite_c3506_1151	13613	110.447	0.492583004602235
	Kukri_c42081_252	13676	120.138	0.440131015369111
	BobWhite_c35035_317	13702	135.758	0.499918860805712
	BS00021704_51	13708	140.866	0.498398006407974
	BobWhite_rep_c52775_117	13718	150.539	0.461859410430839
Mean	-	-	-	0.435285862222616
7B	Kukri_c542_1538	15312	0	0.477379692617788
	BS00076402_51	15325	10.0607	0.406203091403302
	RAC875_c1610_485	15335	19.1844	0.461370433504476
	Excalibur_rep_c106461_262	15347	35.7676	0.386549771616794
	CAP12_c1816_325	15356	46.2087	0.420750582246637
	wsnp_Ex_c2103_3947695	15363	50.4035	0.477909854355146
	wsnp_be496863B_Ta_2_1	15443	60.0144	0.447904983175773
	Excalibur_c50328_368	15554	70.1439	0.452587553539935
	Tdurum_contig32378_439	15884	80.8949	0.461859410430839
	BS00089942_51	15949	90.4152	0.499591836734694
	BobWhite_c40042_842	16027	101.185	0.460085663895188
	Kukri_c15912_812	16067	111.527	0.406611668938889
	BS00101364_51	16103	120.11	0.447904983175773
	Tdurum_contig17697_671	16135	130.677	0.437913832199546
	D_contig16314_353	16255	140.061	0.316170319979844
	Tdurum_contig75127_589	16336	150.192	0.437189552956257
	Excalibur_c33267_538	16408	160.184	0.499679538535491
	BS00004171_51	16475	171.11	0.499817436812853
	BS00061940_51	16514	189.303	0.35265306122449
	wsnp_Ex_rep_c67593_66232317	16516	203.276	0.317728729085084
	BobWhite_c24067_519	16519	212.369	0.495278151747723
	RAC875_c42674_239	16534	223.524	0.499979454306377
	Excalibur_c18631_169	16538	232.253	0.296417233560091
Mean	-	-	-	0.433023340697521
Mean B genome	-	-	-	0.481083062373352
Total Mean	-	-	-	0.48

## Sheet: Table S4
Table S4. STRUCTURE output affiliations of the 366 Tunisian durum wheat genotypes at K=3 and their resistance RAUDPC scores to isolate Tun06
Accession ID	MLG	UPGMA order	UPGMA Label	Landrace	GS1	GS2	GS3	Subpopulation	%P TUN06
29338	MLG270	77	MLG270_29338_Azi	Azizi AP3 (58)	0.553	0.446	0.001	Admix	65.9821
29164	MLG95	93	MLG95_29164_Azi	Azizi AP3 (58)	0.249	0.333	0.418	Admix	16.1997
29271	MLG221	80	MLG221_29271_Bia	Biada RP1 (25)	0.552	0.196	0.252	Admix	73.6744
29287	MLG222	81	MLG222_29287_Bia	Biada RP1 (25)	0.555	0.194	0.251	Admix	64.8283
28650	MLG29	320	MLG29_28650_Bia	Biada RP1 (25)	0.132	0.151	0.717	Admix	74.5913
28751	MLG54	310	MLG54_28751_Bia	Biada RP1 (25)	0.068	0.185	0.747	Admix	62.734
28665	MLG55	311	MLG55_28665_Bia	Biada RP1 (25)	0.059	0.21	0.731	Admix	80.5275
28614	MLG96	92	MLG96_28614_Bia	Biada RP1 (25)	0.176	0.324	0.5	Admix	4.72284
28661	MLG124	308	MLG124_28661_Bid	Bidi	0.297	0.002	0.701	Admix	82.2532
28670	MLG125	307	MLG125_28670_Bid	Bidi	0.297	0.002	0.701	Admix	79.0801
28668	MLG126	306	MLG126_28668_Bid	Bidi	0.297	0.002	0.701	Admix	74.2421
28635	MLG127	305	MLG127_28635_Bid	Bidi	0.296	0.002	0.701	Admix	NA
28653	MLG128	304	MLG128_28653_Bid	Bidi	0.297	0.002	0.701	Admix	81.0994
28664	MLG129	303	MLG129_28664_Bid	Bidi	0.297	0.002	0.701	Admix	78.569
28656	MLG130	301	MLG130_28656_Bid	Bidi	0.296	0.002	0.702	Admix	79.2117
28657	MLG131	302	MLG131_28657_Bid	Bidi	0.296	0.002	0.702	Admix	70.3959
16024	MLG97	154	MLG97_16024_Bis	Biskri Ac1	0.098	0.614	0.288	Admix	66.0251
29477	MLG315	312	MLG315_29477_Bis	Biskri Ac1	0.111	0.266	0.623	Admix	33.0895
14842	MLG136	117	MLG136_14842_Jne	Jneh Khotifa (193)	0.297	0.693	0.01	Admix	4.76681
14843	MLG137	116	MLG137_14843_Jne	Jneh Khotifa (193)	0.292	0.7	0.008	Admix	13.8609
16216	MLG150	112	MLG150_16216_Jne	Jneh Khotifa (193)	0.527	0.47	0.002	Admix	24.0674
16185	MLG151	111	MLG151_16185_Jne	Jneh Khotifa (193)	0.519	0.479	0.002	Admix	9.71013
16207	MLG152	114	MLG152_16207_Jne	Jneh Khotifa (193)	0.5	0.495	0.005	Admix	53.1767
16186	MLG153	113	MLG153_16186_Jne	Jneh Khotifa (193)	0.607	0.39	0.003	Admix	11.5674
16193	MLG154	115	MLG154_16193_Jne	Jneh Khotifa (193)	0.332	0.659	0.009	Admix	-7.33441
16215	MLG160	110	MLG160_16215_Jne	Jneh Khotifa (193)	0.419	0.579	0.002	Admix	36.7294
16217	MLG161	109	MLG161_16217_Jne	Jneh Khotifa (193)	0.419	0.579	0.002	Admix	-4.49787
16214	MLG162	108	MLG162_16214_Jne	Jneh Khotifa (193)	0.419	0.579	0.002	Admix	0.094744
14844	MLG268	76	MLG268_14844_Jne	Jneh Khotifa (193)	0.581	0.418	0.001	Admix	12.6767
16066	MLG177	184	MLG177_16066_Mah	Mahmoudi (122)	0.345	0.653	0.001	Admix	28.5082
16058	MLG206	78	MLG206_16058_Mah	Mahmoudi (122)	0.526	0.474	0.001	Admix	75.8328
15524	MLG98	91	MLG98_15524_Mah	Mahmoudi (122)	0.416	0.474	0.109	Admix	75.3217
16065	MLG178	183	MLG178_16065_Mah	Mahmoudi (986)	0.345	0.654	0.001	Admix	25.0644
14845	MLG268	75	MLG268_14845_Mah	Mahmoudi (986)	0.581	0.418	0.001	Admix	35.1767
29268	MLG272	96	MLG272_29268_Mah	Mahmoudi (986)	0.375	0.621	0.004	Admix	12.0752
29269	MLG273	95	MLG273_29269_Mah	Mahmoudi (986)	0.375	0.621	0.004	Admix	61.1441
28601	MLG274	98	MLG274_28601_Mah	Mahmoudi (986)	0.367	0.629	0.004	Admix	11.8281
28615	MLG275	97	MLG275_28615_Mah	Mahmoudi (986)	0.381	0.615	0.004	Admix	4.72284
15966	MLG276	99	MLG276_15966_Mah	Mahmoudi (986)	0.369	0.628	0.004	Admix	3.0393
29215	MLG277	100	MLG277_29215_Mah	Mahmoudi (986)	0.368	0.628	0.003	Admix	14.8839
28772	MLG278	101	MLG278_28772_Mah	Mahmoudi (986)	0.369	0.628	0.004	Admix	70.0771
15928	MLG279	102	MLG279_15928_Mah	Mahmoudi (986)	0.368	0.628	0.004	Admix	29.6031
15965	MLG280	103	MLG280_15965_Mah	Mahmoudi (986)	0.368	0.628	0.004	Admix	19.0919
14864	MLG281	104	MLG281_14864_Mah	Mahmoudi (986)	0.368	0.628	0.004	Admix	2.93989
29213	MLG282	105	MLG282_29213_Mah	Mahmoudi (986)	0.368	0.628	0.004	Admix	41.1137
15972	MLG283	107	MLG283_15972_Mah	Mahmoudi (986)	0.366	0.631	0.003	Admix	-0.513327
15974	MLG284	106	MLG284_15974_Mah	Mahmoudi (986)	0.369	0.627	0.004	Admix	10.4077
14957	MLG285	94	MLG285_14957_Mah	Mahmoudi (986)	0.385	0.612	0.003	Admix	28.9925
49609	MLG287	191	MLG287_49609_Mah	Mahmoudi (986)	0.43	0.562	0.007	Admix	0.898243
99995	MLG165	297	MLG165_99995_Mod	Modern	0.274	0.206	0.52	Admix	67.2849
99996	MLG169	319	MLG169_99996_Mod	Modern	0.226	0.077	0.696	Admix	72.9858
99993	MLG159	300	MLG159_99993_Mod	Modern	0.142	0.189	0.669	Admix	78.9857
99994	MLG216	295	MLG216_99994_Mod	Modern	0.24	0.253	0.507	Admix	69.919
16087	MLG288	84	MLG288_16087_Ric	Richi	0.446	0.54	0.014	Admix	24.0117
16092	MLG289	85	MLG289_16092_Ric	Richi	0.48	0.514	0.005	Admix	25.034
16088	MLG290	83	MLG290_16088_Ric	Richi	0.405	0.591	0.004	Admix	38.2678
16091	MLG291	87	MLG291_16091_Ric	Richi	0.466	0.529	0.005	Admix	25.7678
16096	MLG292	88	MLG292_16096_Ric	Richi	0.465	0.53	0.005	Admix	36.9217
16100	MLG293	90	MLG293_16100_Ric	Richi	0.465	0.529	0.005	Admix	33.0148
16104	MLG294	89	MLG294_16104_Ric	Richi	0.466	0.529	0.005	Admix	38.3994
16103	MLG295	86	MLG295_16103_Ric	Richi	0.477	0.519	0.004	Admix	41.2182
49661	MLG296	79	MLG296_49661_Rou	Roussia (975)	0.512	0.388	0.1	Admix	6.57132
29207	MLG166	318	MLG166_29207_Rou	Roussia (975)	0.213	0.078	0.709	Admix	72.971
29745	MLG158	299	MLG158_29745_Rou	Roussia (975)	0.142	0.188	0.669	Admix	12.5936
29251	MLG217	294	MLG217_29251_Rou	Roussia (975)	0.24	0.253	0.507	Admix	59.3171
28651	MLG218	293	MLG218_28651_Rou	Roussia (975)	0.24	0.253	0.507	Admix	NA
28590	MLG219	291	MLG219_28590_Rou	Roussia (975)	0.24	0.253	0.507	Admix	NA
29442	MLG220	292	MLG220_29442_Rou	Roussia (975)	0.24	0.253	0.507	Admix	31.5084
16210	MLG163	298	MLG163_16210_Sou	Souri	0.274	0.205	0.521	Admix	41.9925
28708	MLG164	296	MLG164_28708_Mah	Souri	0.274	0.206	0.52	Admix	43.4374
15729	MLG166	317	MLG166_15729_Sou	Souri	0.213	0.078	0.709	Admix	67.7205
15733	MLG166	316	MLG166_15733_Sou	Souri	0.213	0.078	0.709	Admix	76.344
15734	MLG166	315	MLG166_15734_Sou	Souri	0.213	0.078	0.709	Admix	75.7012
15732	MLG167	313	MLG167_15732_Sou	Souri	0.213	0.078	0.709	Admix	62.8521
15730	MLG168	314	MLG168_15730_Sou	Souri	0.22	0.064	0.717	Admix	75.8328
29386	MLG170	155	MLG170_29386_Sou	Souri	0.011	0.689	0.3	Admix	64.7675
29400	MLG171	159	MLG171_29400_Sou	Souri	0.002	0.653	0.345	Admix	51.4325
29396	MLG172	158	MLG172_29396_Sou	Souri	0.002	0.654	0.344	Admix	48.9325
29370	MLG173	157	MLG173_29370_Sou	Souri	0.002	0.656	0.341	Admix	60.6329
29379	MLG174	156	MLG174_29379_Sou	Souri	0.002	0.64	0.358	Admix	65.5722
29072	MLG223	72	MLG223_29072_Mah	Mahmoudi (122)	0.999	0	0	GS1	67.971
29115	MLG224	71	MLG224_29115_Mah	Mahmoudi (122)	0.999	0	0	GS1	74.8283
15546	MLG225	70	MLG225_15546_Mah	Mahmoudi (122)	0.999	0	0	GS1	NA
15591	MLG226	69	MLG226_15591_Mah	Mahmoudi (122)	0.999	0	0	GS1	72.8217
29065	MLG227	53	MLG227_29065_Mah	Mahmoudi (122)	0.999	0	0	GS1	NA
29152	MLG227	54	MLG227_29152_Mah	Mahmoudi (122)	0.999	0	0	GS1	60.5722
15441	MLG227	55	MLG227_15441_Mah	Mahmoudi (122)	0.999	0	0	GS1	78.4644
15564	MLG227	56	MLG227_15564_Mah	Mahmoudi (122)	0.999	0	0	GS1	73.8743
15576	MLG227	57	MLG227_15576_Mah	Mahmoudi (122)	0.999	0	0	GS1	77.1486
15929	MLG227	58	MLG227_15929_Mah	Mahmoudi (122)	0.999	0	0	GS1	69.0059
15942	MLG227	59	MLG227_15942_Mah	Mahmoudi (122)	0.999	0	0	GS1	67.8217
15971	MLG227	60	MLG227_15971_Mah	Mahmoudi (122)	0.999	0	0	GS1	38.8136
16160	MLG227	61	MLG227_16160_Mah	Mahmoudi (122)	0.999	0	0	GS1	53.531
29040	MLG227	62	MLG227_29040_Mah	Mahmoudi (122)	0.999	0	0	GS1	80.3959
29082	MLG227	63	MLG227_29082_Mah	Mahmoudi (122)	0.999	0	0	GS1	74.9598
29091	MLG227	64	MLG227_29091_Mah	Mahmoudi (122)	0.999	0	0	GS1	71.7868
29103	MLG227	65	MLG227_29103_Mah	Mahmoudi (122)	0.999	0	0	GS1	67.6218
29107	MLG227	66	MLG227_29107_Mah	Mahmoudi (122)	0.999	0	0	GS1	72.971
29554	MLG227	67	MLG227_29554_Mah	Mahmoudi (122)	0.999	0	0	GS1	67.2748
29561	MLG227	68	MLG227_29561_Mah	Mahmoudi (122)	0.999	0	0	GS1	69.1017
15529	MLG228	52	MLG228_15529_Mah	Mahmoudi (122)	0.999	0	0	GS1	73.434
29139	MLG229	51	MLG229_29139_Mah	Mahmoudi (122)	0.999	0	0	GS1	71.1441
29123	MLG230	50	MLG230_29123_Mah	Mahmoudi (122)	0.999	0	0	GS1	61.8171
29148	MLG231	49	MLG231_29148_Mah	Mahmoudi (122)	0.999	0	0	GS1	68.806
29109	MLG232	48	MLG232_29109_Mah	Mahmoudi (122)	0.999	0	0	GS1	72.3283
15533	MLG233	40	MLG233_15533_Mah	Mahmoudi (122)	0.999	0	0	GS1	73.3328
29208	MLG233	41	MLG233_29208_Mah	Mahmoudi (122)	0.999	0	0	GS1	71.7868
29231	MLG233	42	MLG233_29231_Mah	Mahmoudi (122)	0.999	0	0	GS1	75.6329
29404	MLG233	43	MLG233_29404_Mah	Mahmoudi (122)	0.999	0	0	GS1	70.9821
29479	MLG233	44	MLG233_29479_Mah	Mahmoudi (122)	0.999	0	0	GS1	71.6017
29522	MLG233	45	MLG233_29522_Mah	Mahmoudi (122)	0.999	0	0	GS1	58.297
29531	MLG233	46	MLG233_29531_Mah	Mahmoudi (122)	0.999	0	0	GS1	65.124
29542	MLG233	47	MLG233_29542_Mah	Mahmoudi (122)	0.999	0	0	GS1	58.297
16181	MLG234	35	MLG234_16181_Mah	Mahmoudi (122)	0.999	0	0	GS1	51.6737
29037	MLG234	36	MLG234_29037_Mah	Mahmoudi (122)	0.999	0	0	GS1	79.2117
29043	MLG234	37	MLG234_29043_Mah	Mahmoudi (122)	0.999	0	0	GS1	79.2421
29049	MLG234	38	MLG234_29049_Mah	Mahmoudi (122)	0.999	0	0	GS1	77.9263
29122	MLG234	39	MLG234_29122_Mah	Mahmoudi (122)	0.999	0	0	GS1	65.6936
29494	MLG235	34	MLG235_29494_Mah	Mahmoudi (122)	0.999	0	0	GS1	72.0825
29571	MLG236	33	MLG236_29571_Mah	Mahmoudi (122)	0.999	0	0	GS1	63.9397
15643	MLG237	32	MLG237_15643_Mah	Mahmoudi (122)	0.999	0	0	GS1	69.517
29131	MLG238	31	MLG238_29131_Mah	Mahmoudi (122)	0.999	0	0	GS1	71.306
16182	MLG239	30	MLG239_16182_Mah	Mahmoudi (122)	0.999	0	0	GS1	45.8387
29565	MLG240	29	MLG240_29565_Mah	Mahmoudi (122)	0.999	0	0	GS1	65.4175
16154	MLG241	28	MLG241_16154_Mah	Mahmoudi (122)	0.999	0	0	GS1	69.4925
16155	MLG242	27	MLG242_16155_Mah	Mahmoudi (122)	0.999	0	0	GS1	64.6848
29478	MLG243	26	MLG243_29478_Mah	Mahmoudi (122)	0.999	0	0	GS1	67.9175
16180	MLG244	25	MLG244_16180_Mah	Mahmoudi (122)	0.999	0	0	GS1	69.5229
29512	MLG245	24	MLG245_29512_Mah	Mahmoudi (122)	0.999	0	0	GS1	70.9286
15537	MLG246	23	MLG246_15537_Mah	Mahmoudi (122)	0.999	0	0	GS1	73.9755
28747	MLG247	22	MLG247_28747_Mah	Mahmoudi (122)	0.999	0	0	GS1	74.7532
29081	MLG248	21	MLG248_29081_Mah	Mahmoudi (122)	0.999	0	0	GS1	73.6441
29073	MLG249	20	MLG249_29073_Mah	Mahmoudi (122)	0.999	0	0	GS1	68.1329
16183	MLG250	19	MLG250_16183_Mah	Mahmoudi (122)	0.999	0	0	GS1	63.5006
15534	MLG251	18	MLG251_15534_Mah	Mahmoudi (122)	0.999	0	0	GS1	79.6486
29042	MLG252	17	MLG252_29042_Mah	Mahmoudi (122)	0.999	0	0	GS1	82.2532
29706	MLG253	16	MLG253_29706_Mah	Mahmoudi (122)	0.999	0	0	GS1	45.3163
15590	MLG254	15	MLG254_15590_Mah	Mahmoudi (122)	0.999	0	0	GS1	67.6901
29114	MLG255	14	MLG255_29114_Mah	Mahmoudi (122)	0.999	0	0	GS1	68.0013
29574	MLG256	13	MLG256_29574_Mah	Mahmoudi (122)	0.999	0	0	GS1	53.7474
29147	MLG257	12	MLG257_29147_Mah	Mahmoudi (122)	0.999	0	0	GS1	66.1744
29140	MLG258	11	MLG258_29140_Mah	Mahmoudi (122)	0.999	0	0	GS1	67.3283
16161	MLG259	10	MLG259_16161_Mah	Mahmoudi (122)	0.999	0	0	GS1	60.196
29108	MLG260	9	MLG260_29108_Mah	Mahmoudi (122)	0.999	0	0	GS1	71.306
15587	MLG261	8	MLG261_15587_Mah	Mahmoudi (122)	0.999	0	0	GS1	72.6598
15555	MLG262	7	MLG262_15555_Mah	Mahmoudi (122)	0.999	0	0	GS1	71.5363
16178	MLG262	6	MLG262_16178_Mah	Mahmoudi (122)	0.999	0	0	GS1	63.369
29703	MLG263	5	MLG263_29703_Mah	Mahmoudi (122)	0.999	0	0	GS1	59.7748
16176	MLG264	4	MLG264_16176_Mah	Mahmoudi (122)	0.999	0	0	GS1	68.3387
28600	MLG265	3	MLG265_28600_Mah	Mahmoudi (122)	0.999	0	0	GS1	70.4263
29403	MLG266	2	MLG266_29403_Mah	Mahmoudi (122)	0.999	0	0	GS1	72.971
29057	MLG267	1	MLG267_29057_Mah	Mahmoudi (122)	0.999	0	0	GS1	78.0579
16168	MLG269	74	MLG269_16168_Mah	Mahmoudi (122)	0.842	0.157	0.001	GS1	69.6545
29572	MLG286	73	MLG286_29572_Mah	Mahmoudi (122)	0.854	0.145	0.001	GS1	26.627
15131	MLG100	142	MLG100_15131_Azi	Azizi AP3 (58)	0.001	0.851	0.148	GS2	77.3275
15132	MLG101	143	MLG101_15132_Azi	Azizi AP3 (58)	0.001	0.85	0.149	GS2	53.1626
28607	MLG28	129	MLG28_28607_Azi	Azizi AP3 (58)	0.003	0.928	0.07	GS2	28.2451
15953	MLG31	136	MLG31_15953_Azi	Azizi AP3 (58)	0.001	0.996	0.003	GS2	41.9158
14868	MLG32	140	MLG32_14868_Azi	Azizi AP3 (58)	0.003	0.915	0.082	GS2	21.7405
14853	MLG33	139	MLG33_14853_Azi	Azizi AP3 (58)	0.003	0.914	0.082	GS2	35.4399
16023	MLG34	130	MLG34_16023_Azi	Azizi AP3 (58)	0.001	0.896	0.103	GS2	NA
14849	MLG35	153	MLG35_14849_Azi	Azizi AP3 (58)	0.059	0.913	0.028	GS2	37.2567
14861	MLG36	138	MLG36_14861_Azi	Azizi AP3 (58)	0.001	0.997	0.003	GS2	35.4399
14860	MLG37	137	MLG37_14860_Azi	Azizi AP3 (58)	0.001	0.997	0.003	GS2	40.4399
16086	MLG38	134	MLG38_16086_Azi	Azizi AP3 (58)	0.001	0.976	0.023	GS2	30.0644
14871	MLG39	133	MLG39_14871_Azi	Azizi AP3 (58)	0.001	0.975	0.024	GS2	19.5644
14964	MLG4	145	MLG4_14964_Azi	Azizi AP3 (58)	0.001	0.864	0.135	GS2	47.4895
14857	MLG40	135	MLG40_14857_Azi	Azizi AP3 (58)	0.001	0.987	0.013	GS2	15.0451
16145	MLG41	132	MLG41_16145_Azi	Azizi AP3 (58)	0.001	0.876	0.122	GS2	1.21823
16146	MLG42	131	MLG42_16146_Azi	Azizi AP3 (58)	0.001	0.875	0.124	GS2	20.4136
15584	MLG5	146	MLG5_15584_Azi	Azizi AP3 (58)	0.002	0.864	0.135	GS2	76.6375
29041	MLG57	244	MLG57_29041_Azi	Azizi AP3 (58)	0.007	0.902	0.091	GS2	73.0882
29036	MLG58	243	MLG58_29036_Azi	Azizi AP3 (58)	0.007	0.903	0.091	GS2	49.6216
14873	MLG59	128	MLG59_14873_Azi	Azizi AP3 (58)	0.001	0.992	0.007	GS2	67.2972
15130	MLG6	148	MLG6_15130_Azi	Azizi AP3 (58)	0.001	0.864	0.135	GS2	77.4288
15525	MLG60	127	MLG60_15525_Azi	Azizi AP3 (58)	0.001	0.992	0.007	GS2	46.6375
15141	MLG61	126	MLG61_15141_Azi	Azizi AP3 (58)	0.001	0.991	0.008	GS2	74.4176
15135	MLG62	125	MLG62_15135_Azi	Azizi AP3 (58)	0.001	0.991	0.008	GS2	56.9783
15142	MLG63	152	MLG63_15142_Azi	Azizi AP3 (58)	0.061	0.797	0.143	GS2	83.7445
15134	MLG64	151	MLG64_15134_Azi	Azizi AP3 (58)	0.061	0.796	0.143	GS2	82.5907
15168	MLG65	124	MLG65_15168_Azi	Azizi AP3 (58)	0.001	0.991	0.008	GS2	66.948
15139	MLG66	123	MLG66_15139_Azi	Azizi AP3 (58)	0.001	0.99	0.009	GS2	89.2557
15136	MLG67	122	MLG67_15136_Azi	Azizi AP3 (58)	0.001	0.991	0.008	GS2	77.9399
15138	MLG68	121	MLG68_15138_Azi	Azizi AP3 (58)	0.001	0.991	0.008	GS2	83.4814
15171	MLG69	149	MLG69_15171_Azi	Azizi AP3 (58)	0.047	0.929	0.024	GS2	66.5363
15129	MLG7	147	MLG7_15129_Azi	Azizi AP3 (58)	0.001	0.864	0.135	GS2	76.2749
15902	MLG70	246	MLG70_15902_Azi	Azizi AP3 (58)	0.109	0.889	0.002	GS2	72.1486
28695	MLG71	245	MLG71_28695_Azi	Azizi AP3 (58)	0.105	0.874	0.021	GS2	74.1813
15087	MLG72	150	MLG72_15087_Azi	Azizi AP3 (58)	0.001	0.927	0.072	GS2	55.5715
15088	MLG8	144	MLG8_15088_Azi	Azizi AP3 (58)	0.001	0.875	0.123	GS2	79.286
15133	MLG99	141	MLG99_15133_Azi	Azizi AP3 (58)	0.001	0.85	0.149	GS2	34.9288
16255	MLG297	192	MLG297_16255_Bad	Badri	0.195	0.801	0.004	GS2	17.6656
14764	MLG298	193	MLG298_14764_Bad	Badri	0.196	0.8	0.004	GS2	20.6575
14749	MLG299	194	MLG299_14749_Bad	Badri	0.196	0.8	0.004	GS2	14.1241
14767	MLG299	195	MLG299_14767_Bad	Badri	0.196	0.8	0.004	GS2	17.0037
14769	MLG299	196	MLG299_14769_Bad	Badri	0.196	0.8	0.004	GS2	3.59778
14772	MLG299	197	MLG299_14772_Bad	Badri	0.196	0.8	0.004	GS2	20.1767
16218	MLG299	198	MLG299_16218_Bad	Badri	0.196	0.8	0.004	GS2	5.76782
16278	MLG299	199	MLG299_16278_Bad	Badri	0.196	0.8	0.004	GS2	-7.33441
16297	MLG299	200	MLG299_16297_Bad	Badri	0.196	0.8	0.004	GS2	1.51175
16267	MLG300	201	MLG300_16267_Bad	Badri	0.196	0.801	0.004	GS2	-7.33441
16288	MLG301	202	MLG301_16288_Bad	Badri	0.196	0.8	0.004	GS2	-4.83441
16256	MLG302	203	MLG302_16256_Bad	Badri	0.196	0.8	0.004	GS2	-7.33441
14748	MLG303	204	MLG303_14748_Bad	Badri	0.195	0.801	0.004	GS2	17.869
16220	MLG304	205	MLG304_16220_Bad	Badri	0.196	0.8	0.004	GS2	34.614
14753	MLG305	206	MLG305_14753_Bad	Badri	0.195	0.801	0.004	GS2	14.3291
14759	MLG306	207	MLG306_14759_Bad	Badri	0.196	0.8	0.004	GS2	16.4925
16244	MLG307	208	MLG307_16244_Bad	Badri	0.196	0.8	0.004	GS2	5.13523
14770	MLG308	209	MLG308_14770_Bad	Badri	0.196	0.801	0.004	GS2	10.3083
16245	MLG309	210	MLG309_16245_Bad	Badri	0.196	0.799	0.004	GS2	10.616
16268	MLG310	212	MLG310_16268_Bad	Badri	0.181	0.815	0.003	GS2	-3.00748
14771	MLG311	211	MLG311_14771_Bad	Badri	0.195	0.801	0.004	GS2	29.534
15125	MLG1	260	MLG1_15125_Bis	Biskri Ac1	0.091	0.9	0.009	GS2	57.9703
28672	MLG149	267	MLG149_28672_Bis	Biskri Ac1	0.002	0.997	0.001	GS2	40.8058
49649	MLG175	264	MLG175_49649_Bis	Biskri Ac1	0.162	0.838	0.001	GS2	32.214
49652	MLG176	263	MLG176_49652_Bis	Biskri Ac1	0.161	0.838	0.001	GS2	63.7171
28681	MLG179	271	MLG179_28681_Bis	Biskri Ac1	0.001	0.998	0.001	GS2	71.8737
14794	MLG180	270	MLG180_14794_Bis	Biskri Ac1	0.001	0.998	0.001	GS2	79.9288
29354	MLG181	284	MLG181_29354_Bis	Biskri Ac1	0.001	0.999	0.001	GS2	63.0013
29356	MLG182	285	MLG182_29356_Bis	Biskri Ac1	0.001	0.998	0.001	GS2	51.4325
28769	MLG183	286	MLG183_28769_Bis	Biskri Ac1	0.001	0.998	0.001	GS2	73.7613
29339	MLG184	287	MLG184_29339_Bis	Biskri Ac1	0.001	0.998	0.001	GS2	62.1663
14773	MLG185	288	MLG185_14773_Bis	Biskri Ac1	0.001	0.998	0.001	GS2	73.7749
14783	MLG186	268	MLG186_14783_Bis	Biskri Ac1	0.001	0.998	0.001	GS2	79.9288
29562	MLG187	278	MLG187_29562_Bis	Biskri Ac1	0.001	0.998	0	GS2	61.4094
29567	MLG188	277	MLG188_29567_Bis	Biskri Ac1	0.001	0.998	0.001	GS2	50.0329
16114	MLG189	280	MLG189_16114_Bis	Biskri Ac1	0.001	0.998	0.001	GS2	68.8498
14841	MLG190	275	MLG190_14841_Bis	Biskri Ac1	0.002	0.998	0.001	GS2	66.786
14797	MLG191	274	MLG191_14797_Bis	Biskri Ac1	0.001	0.998	0.001	GS2	73.7445
16105	MLG192	290	MLG192_16105_Bis	Biskri Ac1	0.001	0.998	0.001	GS2	60.3883
16106	MLG192	289	MLG192_16106_Bis	Biskri Ac1	0.001	0.998	0.001	GS2	55.2263
29566	MLG193	276	MLG193_29566_Bis	Biskri Ac1	0.001	0.998	0.001	GS2	63.3679
14839	MLG194	273	MLG194_14839_Bis	Biskri Ac1	0.001	0.998	0.001	GS2	67.4288
14956	MLG195	281	MLG195_14956_Bis	Biskri Ac1	0.001	0.998	0.001	GS2	54.8275
14780	MLG196	283	MLG196_14780_Bis	Biskri Ac1	0.001	0.998	0.001	GS2	70.4703
16113	MLG197	282	MLG197_16113_Bis	Biskri Ac1	0.001	0.998	0.001	GS2	61.3498
14846	MLG198	269	MLG198_14846_Bis	Biskri Ac1	0.003	0.971	0.026	GS2	72.9703
14792	MLG199	279	MLG199_14792_Bis	Biskri Ac1	0.001	0.998	0.001	GS2	70.6018
15102	MLG2	262	MLG2_15102_Bis	Biskri Ac1	0.09	0.909	0.001	GS2	81.1433
29575	MLG200	266	MLG200_29575_Bis	Biskri Ac1	0.002	0.997	0.001	GS2	65.7667
29576	MLG201	265	MLG201_29576_Bis	Biskri Ac1	0.002	0.997	0.001	GS2	69.5825
16184	MLG202	272	MLG202_16184_Bis	Biskri Ac1	0.006	0.993	0.001	GS2	55.7071
15107	MLG3	261	MLG3_15107_Bis	Biskri Ac1	0.09	0.906	0.005	GS2	77.6211
28671	MLG138	259	MLG138_28671_Bis	Biskri glabre	0.002	0.997	0.001	GS2	41.2562
28720	MLG139	258	MLG139_28720_Bis	Biskri glabre	0.002	0.997	0.001	GS2	28.817
28682	MLG140	257	MLG140_28682_Bis	Biskri glabre	0.002	0.997	0.001	GS2	72.1216
28721	MLG141	256	MLG141_28721_Bis	Biskri glabre	0.002	0.997	0.001	GS2	54.7228
28746	MLG142	255	MLG142_28746_Bis	Biskri glabre	0.002	0.997	0.001	GS2	64.8848
28759	MLG143	254	MLG143_28759_Bis	Biskri glabre	0.002	0.997	0.001	GS2	29.4445
28752	MLG144	253	MLG144_28752_Bis	Biskri glabre	0.002	0.997	0.001	GS2	47.9263
28694	MLG145	252	MLG145_28694_Bis	Biskri glabre	0.002	0.997	0.001	GS2	43.4071
28709	MLG146	251	MLG146_28709_Bis	Biskri glabre	0.002	0.997	0.001	GS2	27.5315
28760	MLG147	250	MLG147_28760_Bis	Biskri glabre	0.002	0.997	0.001	GS2	40.2947
28733	MLG148	249	MLG148_28733_Bis	Biskri glabre	0.002	0.997	0.001	GS2	38.4678
28732	MLG155	248	MLG155_28732_Bis	Biskri glabre	0.035	0.963	0.002	GS2	43.9789
16211	MLG133	118	MLG133_16211_Jne	Jneh Khotifa (193)	0.086	0.89	0.025	GS2	-5.31517
16206	MLG134	120	MLG134_16206_Jne	Jneh Khotifa (193)	0.086	0.89	0.024	GS2	-7.33441
16194	MLG135	119	MLG135_16194_Jne	Jneh Khotifa (193)	0.085	0.888	0.027	GS2	-7.33441
28776	MLG10	219	MLG10_28776_Mek	Mekki (121/198)	0.005	0.994	0.001	GS2	15.8767
29735	MLG102	238	MLG102_29735_Mek	Mekki (121/198)	0.035	0.964	0.001	GS2	20.124
29502	MLG11	231	MLG11_29502_Mek	Mekki (121/198)	0.015	0.972	0.013	GS2	33.5855
29726	MLG12	221	MLG12_29726_Mek	Mekki (121/198)	0.004	0.995	0.001	GS2	57.8719
29458	MLG13	230	MLG13_29458_Mek	Mekki (121/198)	0.005	0.994	0.001	GS2	-0.92868
29457	MLG14	232	MLG14_29457_Mek	Mekki (121/198)	0.005	0.994	0.001	GS2	2.72517
29443	MLG15	233	MLG15_29443_Mek	Mekki (121/198)	0.006	0.993	0.001	GS2	1.11369
29476	MLG15	235	MLG15_29476_Mek	Mekki (121/198)	0.006	0.993	0.001	GS2	1.57132
29474	MLG16	234	MLG16_29474_Mek	Mekki (121/198)	0.005	0.994	0.001	GS2	1.57132
29466	MLG17	229	MLG17_29466_Mek	Mekki (121/198)	0.004	0.995	0.001	GS2	9.55209
28988	MLG18	218	MLG18_28988_Mek	Mekki (121/198)	0.004	0.994	0.001	GS2	6.54976
28995	MLG18	217	MLG18_28995_Mek	Mekki (121/198)	0.004	0.994	0.001	GS2	36.8281
29450	MLG18	216	MLG18_29450_Mek	Mekki (121/198)	0.004	0.994	0.001	GS2	19.226
28973	MLG19	215	MLG19_28973_Mek	Mekki (121/198)	0.005	0.994	0.001	GS2	20.072
29449	MLG20	214	MLG20_29449_Mek	Mekki (121/198)	0.005	0.994	0.001	GS2	24.0084
28777	MLG21	213	MLG21_28777_Mek	Mekki (121/198)	0.005	0.994	0.001	GS2	12.7036
28778	MLG22	228	MLG22_28778_Mek	Mekki (121/198)	0.007	0.993	0.001	GS2	8.37669
28791	MLG23	227	MLG23_28791_Mek	Mekki (121/198)	0.006	0.994	0.001	GS2	7.22284
29005	MLG24	226	MLG24_29005_Mek	Mekki (121/198)	0.006	0.993	0.001	GS2	29.2016
28989	MLG25	222	MLG25_28989_Mek	Mekki (121/198)	0.004	0.994	0.002	GS2	18.9182
29016	MLG25	223	MLG25_29016_Mek	Mekki (121/198)	0.004	0.994	0.002	GS2	27.4405
29025	MLG26	225	MLG26_29025_Mek	Mekki (121/198)	0.004	0.994	0.002	GS2	33.9182
29017	MLG27	224	MLG27_29017_Mek	Mekki (121/198)	0.004	0.994	0.002	GS2	26.6358
29727	MLG87	237	MLG87_29727_Mek	Mekki (121/198)	0.035	0.964	0.001	GS2	24.6381
29130	MLG88	236	MLG88_29130_Mek	Mekki (121/198)	0.003	0.996	0.001	GS2	32.0955
29736	MLG89	240	MLG89_29736_Mek	Mekki (121/198)	0.006	0.992	0.002	GS2	22.462
29715	MLG9	220	MLG9_29715_Mek	Mekki (121/198)	0.003	0.996	0.001	GS2	72.7252
29756	MLG90	239	MLG90_29756_Mek	Mekki (121/198)	0.006	0.992	0.002	GS2	28.7474
16095	MLG271	82	MLG271_16095_Ric	Richi	0.236	0.762	0.002	GS2	22.5644
15915	MLG56	242	MLG56_15915_Ric	Richi	0.126	0.777	0.097	GS2	21.2427
15973	MLG94	241	MLG94_15973_Ric	Richi	0.14	0.825	0.035	GS2	19.5297
16179	MLG215	247	MLG215_16179_Sbe	Sbei Glabre Ac1	0.103	0.876	0.021	GS2	31.1474
29588	MLG73	175	MLG73_29588_Sbe	Sbei Glabre Ac1	0.013	0.983	0.004	GS2	39.4509
49624	MLG74	174	MLG74_49624_Sbe	Sbei Glabre Ac1	0.014	0.983	0.004	GS2	20.9539
49653	MLG74	173	MLG74_49653_Sbe	Sbei Glabre Ac1	0.014	0.983	0.004	GS2	18.2667
49654	MLG74	172	MLG74_49654_Sbe	Sbei Glabre Ac1	0.014	0.983	0.004	GS2	20.0632
29714	MLG74	171	MLG74_29714_Sbe	Sbei Glabre Ac1	0.014	0.983	0.004	GS2	62.9175
49630	MLG75	170	MLG75_49630_Sbe	Sbei Glabre Ac1	0.013	0.983	0.003	GS2	11.379
49675	MLG76	169	MLG76_49675_Sbe	Sbei Glabre Ac1	0.012	0.984	0.004	GS2	25.2555
49633	MLG77	168	MLG77_49633_Sbe	Sbei Glabre Ac1	0.013	0.983	0.003	GS2	22.9731
29702	MLG78	167	MLG78_29702_Sbe	Sbei Glabre Ac1	0.012	0.984	0.004	GS2	23.3982
49681	MLG79	166	MLG79_49681_Sbe	Sbei Glabre Ac1	0.011	0.985	0.004	GS2	36.7029
49668	MLG80	165	MLG80_49668_Sbe	Sbei Glabre Ac1	0.013	0.983	0.004	GS2	2.2444
29700	MLG81	164	MLG81_29700_Sbe	Sbei Glabre Ac1	0.013	0.984	0.004	GS2	23.2667
29599	MLG82	163	MLG82_29599_Sbe	Sbei Glabre Ac1	0.013	0.983	0.004	GS2	51.2171
49641	MLG83	162	MLG83_49641_Sbe	Sbei Glabre Ac1	0.013	0.983	0.004	GS2	16.1766
29591	MLG84	161	MLG84_29591_Sbe	Sbei Glabre Ac1	0.014	0.984	0.002	GS2	24.6989
29589	MLG85	160	MLG85_29589_Sbe	Sbei Glabre Ac1	0.014	0.984	0.002	GS2	36.4954
49617	MLG86	176	MLG86_49617_Sbe	Sbei Glabre Ac1	0.035	0.962	0.003	GS2	22.2697
29590	MLG91	177	MLG91_29590_Sbe	Sbei Glabre Ac1	0.021	0.975	0.004	GS2	33.9954
16081	MLG204	186	MLG204_16081_Tag	Taganrog (120)	0.136	0.859	0.005	GS2	-7.33441
16084	MLG205	185	MLG205_16084_Tag	Taganrog (120)	0.134	0.863	0.003	GS2	0.838671
15169	MLG207	182	MLG207_15169_Sbe	Taganrog (120)	0.022	0.97	0.007	GS2	47.1486
49687	MLG208	180	MLG208_49687_Tag	Taganrog (120)	0.002	0.955	0.042	GS2	25.7667
16073	MLG209	187	MLG209_16073_Tag	Taganrog (120)	0.107	0.89	0.003	GS2	14.2901
16074	MLG210	188	MLG210_16074_Tag	Taganrog (120)	0.107	0.89	0.003	GS2	19.9328
16078	MLG211	190	MLG211_16078_Tag	Taganrog (120)	0.107	0.89	0.003	GS2	22.9439
16085	MLG212	189	MLG212_16085_Tag	Taganrog (120)	0.107	0.89	0.003	GS2	19.2901
15954	MLG213	181	MLG213_15954_Tag	Taganrog (120)	0.075	0.922	0.002	GS2	7.87736
49625	MLG92	179	MLG92_49625_Tag	Taganrog (120)	0.085	0.888	0.027	GS2	9.52172
49629	MLG93	178	MLG93_49629_Tag	Taganrog (120)	0.086	0.887	0.027	GS2	6.37901
29230	MLG103	354	MLG103_29230_Bia	Biada RP1 (25)	0	0	0.999	GS3	74.9598
29580	MLG103	355	MLG103_29580_Bia	Biada RP1 (25)	0	0	0.999	GS3	75.2555
29587	MLG103	356	MLG103_29587_Bia	Biada RP1 (25)	0	0	0.999	GS3	63.297
28669	MLG104	357	MLG104_28669_Bia	Biada RP1 (25)	0	0	0.999	GS3	71.7421
29581	MLG104	358	MLG104_29581_Bia	Biada RP1 (25)	0	0	0.999	GS3	77.2444
29221	MLG104	359	MLG104_29221_Bia	Biada RP1 (25)	0	0	0.999	GS3	71.306
29153	MLG105	360	MLG105_29153_Bia	Biada RP1 (25)	0	0	0.999	GS3	67.3991
29585	MLG106	361	MLG106_29585_Bia	Biada RP1 (25)	0	0	0.999	GS3	NA
15588	MLG107	362	MLG107_15588_Bia	Biada RP1 (25)	0	0	0.999	GS3	72.6598
29578	MLG108	363	MLG108_29578_Bia	Biada RP1 (25)	0	0	0.999	GS3	64.132
29240	MLG109	364	MLG109_29240_Bia	Biada RP1 (25)	0	0	0.999	GS3	74.8283
29582	MLG110	365	MLG110_29582_Bia	Biada RP1 (25)	0	0	0.999	GS3	77.2444
29214	MLG111	366	MLG111_29214_Bia	Biada RP1 (25)	0	0	0.999	GS3	74.9598
29183	MLG112	349	MLG112_29183_Bia	Biada RP1 (25)	0	0	0.999	GS3	69.9902
29222	MLG113	350	MLG113_29222_Bia	Biada RP1 (25)	0	0	0.999	GS3	73.1329
29298	MLG114	351	MLG114_29298_Bia	Biada RP1 (25)	0	0	0.999	GS3	69.9902
29260	MLG115	352	MLG115_29260_Bia	Biada RP1 (25)	0	0	0.999	GS3	74.3171
29165	MLG116	348	MLG116_29165_Bia	Biada RP1 (25)	0	0	0.999	GS3	64.9902
29261	MLG117	347	MLG117_29261_Bia	Biada RP1 (25)	0	0	0.999	GS3	69.3171
29584	MLG118	346	MLG118_29584_Bia	Biada RP1 (25)	0	0	0.999	GS3	75.4175
29250	MLG119	353	MLG119_29250_Bia	Biada RP1 (25)	0	0	0.999	GS3	76.1441
28566	MLG121	344	MLG121_28566_Bia	Biada RP1 (25)	0	0	0.999	GS3	NA
28660	MLG122	342	MLG122_28660_Bia	Biada RP1 (25)	0	0	0.999	GS3	78.569
28583	MLG123	343	MLG123_28583_Bia	Biada RP1 (25)	0	0	0.999	GS3	NA
29239	MLG132	322	MLG132_29239_Bia	Biada RP1 (25)	0.117	0.001	0.882	GS3	76.6855
28591	MLG156	321	MLG156_28591_Bia	Biada RP1 (25)	0.126	0.073	0.801	GS3	62.6656
28652	MLG157	309	MLG157_28652_Bia	Biada RP1 (25)	0.22	0.001	0.779	GS3	83.569
29586	MLG30	341	MLG30_29586_Bia	Biada RP1 (25)	0	0	0.999	GS3	NA
29568	MLG43	338	MLG43_29568_Bia	Biada RP1 (25)	0	0	0.999	GS3	61.632
29270	MLG43	339	MLG43_29270_Bia	Biada RP1 (25)	0	0	0.999	GS3	77.4295
16057	MLG43	340	MLG43_16057_Bia	Biada RP1 (25)	0	0	0.999	GS3	74.0059
16231	MLG45	333	MLG45_16231_Bia	Biada RP1 (25)	0	0	0.999	GS3	52.9136
16369	MLG45	332	MLG45_16369_Bia	Biada RP1 (25)	0	0	0.999	GS3	56.3802
28595	MLG45	334	MLG45_28595_Bia	Biada RP1 (25)	0	0	0.999	GS3	NA
29155	MLG45	331	MLG45_29155_Bia	Biada RP1 (25)	0	0	0.999	GS3	80.471
29199	MLG45	330	MLG45_29199_Bia	Biada RP1 (25)	0	0	0.999	GS3	73.0013
29200	MLG45	329	MLG45_29200_Bia	Biada RP1 (25)	0	0	0.999	GS3	70.471
28596	MLG46	328	MLG46_28596_Bia	Biada RP1 (25)	0	0	0.999	GS3	68.4374
28623	MLG47	327	MLG47_28623_Bia	Biada RP1 (25)	0	0	0.999	GS3	59.7532
29191	MLG48	326	MLG48_29191_Bia	Biada RP1 (25)	0	0	0.999	GS3	73.1329
28599	MLG49	325	MLG49_28599_Bia	Biada RP1 (25)	0	0	0.999	GS3	60.4263
29173	MLG50	323	MLG50_29173_Bia	Biada RP1 (25)	0	0	0.999	GS3	73.6744
29182	MLG51	324	MLG51_29182_Bia	Biada RP1 (25)	0	0	0.999	GS3	75.5013
28624	MLG52	336	MLG52_28624_Bia	Biada RP1 (25)	0.001	0.002	0.997	GS3	NA
28636	MLG53	335	MLG53_28636_Bia	Biada RP1 (25)	0	0	0.999	GS3	NA
99992	MLG120	345	MLG120_99992_Mod	Modern	0	0	0.999	GS3	NA
99991	MLG44	337	MLG44_99991_Mod	Modern	0	0	0.999	GS3	76.7704
%P = pourcentage of leaf surface covered by pycnidia
Color shades vary from green to red corresponding to resistant to highly susceptible genotypes, respectively

## Sheet: Table S5
Table S5. Assignment of 366 Tunisian durum wheat genotypes to the genetic subpopulations from K=2 to 20 identified under STRUCTURE using 286 SNPs
Accession ID	MLG	Landrace	K13	K14	K15	K16	K17	K18	K19	K20
15131	MLG100	Azizi AP3 (58)	GS4	GS5	GS11	GS16	GS12	Admix	Admix	Admix
15132	MLG101	Azizi AP3 (58)	GS4	GS5	GS11	GS16	GS12	Admix	Admix	Admix
29338	MLG270	Azizi AP3 (58)	Admix	Admix	Admix	Admix	Admix	Admix	Admix	Admix
28607	MLG28	Azizi AP3 (58)	GS4	GS5	GS11	GS16	GS12	GS18	GS2	GS14
15953	MLG31	Azizi AP3 (58)	GS4	GS5	GS11	GS16	GS12	GS18	GS2	GS14
14868	MLG32	Azizi AP3 (58)	GS4	GS5	GS11	GS16	GS12	GS18	GS2	GS14
14853	MLG33	Azizi AP3 (58)	GS4	GS5	GS11	GS16	GS12	GS18	GS2	GS14
16023	MLG34	Azizi AP3 (58)	GS4	GS5	GS11	GS16	GS12	GS18	GS2	GS14
14849	MLG35	Azizi AP3 (58)	Admix	Admix	Admix	Admix	Admix	Admix	Admix	Admix
14861	MLG36	Azizi AP3 (58)	GS4	GS5	GS11	GS16	GS12	GS18	GS2	GS14
14860	MLG37	Azizi AP3 (58)	GS4	GS5	GS11	GS16	GS12	GS18	GS2	GS14
16086	MLG38	Azizi AP3 (58)	GS4	GS5	GS11	GS16	GS12	GS18	GS2	GS14
14871	MLG39	Azizi AP3 (58)	GS4	GS5	GS11	GS16	GS12	GS18	GS2	GS14
14964	MLG4	Azizi AP3 (58)	GS4	GS5	GS11	GS16	GS12	GS17	GS18	GS1
14857	MLG40	Azizi AP3 (58)	GS4	GS5	GS11	GS16	GS12	GS18	GS2	GS14
16145	MLG41	Azizi AP3 (58)	GS4	GS5	GS11	GS16	GS12	GS18	GS2	GS14
16146	MLG42	Azizi AP3 (58)	GS4	GS5	GS11	GS16	GS12	GS18	GS2	GS14
15584	MLG5	Azizi AP3 (58)	GS4	GS5	GS11	GS16	GS12	GS17	GS18	GS1
29041	MLG57	Azizi AP3 (58)	Admix	Admix	Admix	GS11	GS13	GS15	GS8	GS4
29036	MLG58	Azizi AP3 (58)	Admix	Admix	Admix	GS11	GS13	GS15	GS8	GS4
14873	MLG59	Azizi AP3 (58)	GS4	GS5	GS11	GS16	GS12	GS18	GS2	GS14
15130	MLG6	Azizi AP3 (58)	GS4	GS5	GS11	GS16	GS12	GS17	GS18	GS1
15525	MLG60	Azizi AP3 (58)	GS4	GS5	GS11	GS16	GS12	GS18	GS2	GS14
15141	MLG61	Azizi AP3 (58)	GS4	GS5	GS11	GS16	GS12	GS18	GS2	GS14
15135	MLG62	Azizi AP3 (58)	GS4	GS5	GS11	GS16	GS12	GS18	GS2	GS14
15142	MLG63	Azizi AP3 (58)	GS4	GS5	GS11	GS16	GS12	Admix	Admix	Admix
15134	MLG64	Azizi AP3 (58)	GS4	GS5	GS11	GS16	GS12	Admix	Admix	Admix
15168	MLG65	Azizi AP3 (58)	GS4	GS5	GS11	GS16	GS12	GS18	GS2	GS14
15139	MLG66	Azizi AP3 (58)	GS4	GS5	GS11	GS16	GS12	GS18	GS2	GS14
15136	MLG67	Azizi AP3 (58)	GS4	GS5	GS11	GS16	GS12	GS18	GS2	GS14
15138	MLG68	Azizi AP3 (58)	GS4	GS5	GS11	GS16	GS12	GS18	GS2	GS14
15171	MLG69	Azizi AP3 (58)	GS4	GS5	GS11	GS16	GS12	Admix	Admix	Admix
15129	MLG7	Azizi AP3 (58)	GS4	GS5	GS11	GS16	GS12	GS17	GS18	GS1
15902	MLG70	Azizi AP3 (58)	Admix	Admix	Admix	GS11	GS13	GS15	GS8	GS4
28695	MLG71	Azizi AP3 (58)	Admix	Admix	Admix	GS11	GS13	GS15	GS8	GS4
15087	MLG72	Azizi AP3 (58)	GS4	GS5	GS11	GS16	GS12	Admix	Admix	Admix
15088	MLG8	Azizi AP3 (58)	GS4	GS5	GS11	GS16	GS12	GS17	GS18	GS1
29164	MLG95	Azizi AP3 (58)	Admix	Admix	Admix	Admix	Admix	Admix	Admix	Admix
15133	MLG99	Azizi AP3 (58)	GS4	GS5	GS11	GS16	GS12	Admix	Admix	Admix
16255	MLG297	Badri	GS6	GS3	GS12	GS14	GS6	GS5	GS10	GS11
14764	MLG298	Badri	GS6	GS3	GS12	GS14	GS6	GS5	GS10	GS11
14749	MLG299	Badri	GS6	GS3	GS12	GS14	GS6	GS5	GS10	GS11
14767	MLG299	Badri	GS6	GS3	GS12	GS14	GS6	GS5	GS10	GS11
14769	MLG299	Badri	GS6	GS3	GS12	GS14	GS6	GS5	GS10	GS11
14772	MLG299	Badri	GS6	GS3	GS12	GS14	GS6	GS5	GS10	GS11
16218	MLG299	Badri	GS6	GS3	GS12	GS14	GS6	GS5	GS10	GS11
16278	MLG299	Badri	GS6	GS3	GS12	GS14	GS6	GS5	GS10	GS11
16297	MLG299	Badri	GS6	GS3	GS12	GS14	GS6	GS5	GS10	GS11
16267	MLG300	Badri	GS6	GS3	GS12	GS14	GS6	GS5	GS10	GS11
16288	MLG301	Badri	GS6	GS3	GS12	GS14	GS6	GS5	GS10	GS11
16256	MLG302	Badri	GS6	GS3	GS12	GS14	GS6	GS5	GS10	GS11
14748	MLG303	Badri	GS6	GS3	GS12	GS14	GS6	GS5	GS10	GS11
16220	MLG304	Badri	GS6	GS3	GS12	GS14	GS6	GS5	GS10	GS11
14753	MLG305	Badri	GS6	GS3	GS12	GS14	GS6	GS5	GS10	GS11
14759	MLG306	Badri	GS6	GS3	GS12	GS14	GS6	GS5	GS10	GS11
16244	MLG307	Badri	GS6	GS3	GS12	GS14	GS6	GS5	GS10	GS11
14770	MLG308	Badri	GS6	GS3	GS12	GS14	GS6	GS5	GS10	GS11
16245	MLG309	Badri	GS6	GS3	GS12	GS14	GS6	GS5	GS10	GS11
16268	MLG310	Badri	GS6	GS3	GS12	GS14	GS6	GS5	GS10	GS11
14771	MLG311	Badri	GS6	GS3	GS12	GS14	GS6	GS5	GS10	GS11
29230	MLG103	Biada RP1 (25)	GS12	GS10	GS10	GS10	GS3	GS9	GS11	GS19
29580	MLG103	Biada RP1 (25)	GS12	GS10	GS10	GS10	GS3	GS9	GS11	GS19
29587	MLG103	Biada RP1 (25)	GS12	GS10	GS10	GS10	GS3	GS9	GS11	GS19
28669	MLG104	Biada RP1 (25)	GS12	GS10	GS10	GS10	GS3	GS9	GS11	GS19
29581	MLG104	Biada RP1 (25)	GS12	GS10	GS10	GS10	GS3	GS9	GS11	GS19
29221	MLG104	Biada RP1 (25)	GS12	GS10	GS10	GS10	GS3	GS9	GS11	GS19
29153	MLG105	Biada RP1 (25)	GS12	GS10	GS10	GS10	GS3	GS9	GS11	GS19
29585	MLG106	Biada RP1 (25)	GS12	GS10	GS10	GS10	GS3	GS9	GS11	GS19
15588	MLG107	Biada RP1 (25)	GS12	GS10	GS10	GS10	GS3	GS9	GS11	GS19
29578	MLG108	Biada RP1 (25)	GS12	GS10	GS10	GS10	GS3	GS9	GS11	GS19
29240	MLG109	Biada RP1 (25)	GS12	GS10	GS10	GS10	GS3	GS9	GS11	GS19
29582	MLG110	Biada RP1 (25)	GS12	GS10	GS10	GS10	GS3	GS9	GS11	GS19
29214	MLG111	Biada RP1 (25)	GS12	GS10	GS10	GS10	GS3	GS9	GS11	GS19
29183	MLG112	Biada RP1 (25)	GS12	GS10	GS10	GS10	GS3	GS9	GS11	GS19
29222	MLG113	Biada RP1 (25)	GS12	GS10	GS10	GS10	GS3	GS9	GS11	GS19
29298	MLG114	Biada RP1 (25)	GS12	GS10	GS10	GS10	GS3	GS9	GS11	GS19
29260	MLG115	Biada RP1 (25)	GS12	GS10	GS10	GS10	GS3	GS9	GS11	GS19
29165	MLG116	Biada RP1 (25)	GS12	GS10	GS10	GS10	GS3	GS9	GS11	GS19
29261	MLG117	Biada RP1 (25)	GS12	GS10	GS10	GS10	GS3	GS9	GS11	GS19
29584	MLG118	Biada RP1 (25)	GS12	GS10	GS10	GS10	GS3	GS9	GS11	GS19
29250	MLG119	Biada RP1 (25)	GS12	GS10	GS10	GS10	GS3	GS9	GS11	GS19
28566	MLG121	Biada RP1 (25)	GS12	GS10	GS10	GS10	GS3	GS9	GS11	GS19
28660	MLG122	Biada RP1 (25)	GS12	GS10	GS10	GS10	GS3	GS9	GS11	GS19
28583	MLG123	Biada RP1 (25)	GS12	GS10	GS10	GS10	GS3	GS9	GS11	GS19
29239	MLG132	Biada RP1 (25)	Admix	Admix	Admix	Admix	Admix	Admix	Admix	Admix
28591	MLG156	Biada RP1 (25)	Admix	Admix	Admix	Admix	Admix	Admix	Admix	Admix
28652	MLG157	Biada RP1 (25)	Admix	Admix	Admix	Admix	Admix	Admix	Admix	Admix
29271	MLG221	Biada RP1 (25)	Admix	Admix	Admix	Admix	Admix	Admix	Admix	Admix
29287	MLG222	Biada RP1 (25)	Admix	Admix	Admix	Admix	Admix	Admix	Admix	Admix
28650	MLG29	Biada RP1 (25)	Admix	Admix	Admix	Admix	Admix	Admix	Admix	Admix
29586	MLG30	Biada RP1 (25)	GS12	GS10	GS10	GS10	GS3	GS9	GS11	GS19
29568	MLG43	Biada RP1 (25)	GS12	GS10	GS10	GS10	GS3	GS9	GS11	GS19
29270	MLG43	Biada RP1 (25)	GS12	GS10	GS10	GS10	GS3	GS9	GS11	GS19
16057	MLG43	Biada RP1 (25)	GS12	GS10	GS10	GS10	GS3	GS9	GS11	GS19
16231	MLG45	Biada RP1 (25)	GS12	GS10	GS10	GS10	GS3	GS9	GS11	GS19
16369	MLG45	Biada RP1 (25)	GS12	GS10	GS10	GS10	GS3	GS9	GS11	GS19
28595	MLG45	Biada RP1 (25)	GS12	GS10	GS10	GS10	GS3	GS9	GS11	GS19
29155	MLG45	Biada RP1 (25)	GS12	GS10	GS10	GS10	GS3	GS9	GS11	GS19
29199	MLG45	Biada RP1 (25)	GS12	GS10	GS10	GS10	GS3	GS9	GS11	GS19
29200	MLG45	Biada RP1 (25)	GS12	GS10	GS10	GS10	GS3	GS9	GS11	GS19
28596	MLG46	Biada RP1 (25)	GS12	GS10	GS10	GS10	GS3	GS9	GS11	GS19
28623	MLG47	Biada RP1 (25)	GS12	GS10	GS10	GS10	GS3	GS9	GS11	GS19
29191	MLG48	Biada RP1 (25)	GS12	GS10	GS10	GS10	GS3	GS9	GS11	GS19
28599	MLG49	Biada RP1 (25)	GS12	GS10	GS10	GS10	GS3	GS9	GS11	GS19
29173	MLG50	Biada RP1 (25)	GS12	GS10	GS10	GS10	GS3	GS9	GS11	GS19
29182	MLG51	Biada RP1 (25)	GS12	GS10	GS10	GS10	GS3	GS9	GS11	GS19
28624	MLG52	Biada RP1 (25)	GS12	GS10	GS10	GS10	GS3	GS9	GS11	GS19
28636	MLG53	Biada RP1 (25)	GS12	GS10	GS10	GS10	GS3	GS9	GS11	GS19
28751	MLG54	Biada RP1 (25)	Admix	Admix	Admix	Admix	Admix	Admix	GS12	Admix
28665	MLG55	Biada RP1 (25)	Admix	Admix	Admix	Admix	Admix	Admix	GS12	Admix
28614	MLG96	Biada RP1 (25)	Admix	Admix	Admix	Admix	Admix	Admix	Admix	Admix
28661	MLG124	Bidi	GS3	GS8	GS4	GS9	GS8	GS6	GS6	GS8
28670	MLG125	Bidi	GS3	GS8	GS4	GS9	GS8	GS6	GS6	GS8
28668	MLG126	Bidi	GS3	GS8	GS4	GS9	GS8	GS6	GS6	GS8
28635	MLG127	Bidi	GS3	GS8	GS4	GS9	GS8	GS6	GS6	GS8
28653	MLG128	Bidi	GS3	GS8	GS4	GS9	GS8	GS6	GS6	GS8
28664	MLG129	Bidi	GS3	GS8	GS4	GS9	GS8	GS6	GS6	GS8
28656	MLG130	Bidi	GS3	GS8	GS4	GS9	GS8	GS6	GS6	GS8
28657	MLG131	Bidi	GS3	GS8	GS4	GS9	GS8	GS6	GS6	GS8
15125	MLG1	Biskri Ac1	Admix	Admix	Admix	Admix	Admix	Admix	Admix	Admix
28672	MLG149	Biskri Ac1	Admix	Admix	Admix	Admix	Admix	Admix	Admix	Admix
49649	MLG175	Biskri Ac1	GS9	GS14	GS13	GS8	GS15	GS14	GS15	GS20
49652	MLG176	Biskri Ac1	GS9	GS14	GS13	GS8	GS15	GS14	GS15	GS20
28681	MLG179	Biskri Ac1	GS9	GS14	GS13	GS8	GS15	GS14	GS15	GS20
14794	MLG180	Biskri Ac1	GS9	GS14	GS13	GS8	GS15	GS14	GS15	GS20
29354	MLG181	Biskri Ac1	GS9	GS14	GS13	GS8	GS15	GS14	GS15	GS20
29356	MLG182	Biskri Ac1	GS9	GS14	GS13	GS8	GS15	GS14	GS15	GS20
28769	MLG183	Biskri Ac1	GS9	GS14	GS13	GS8	GS15	GS14	GS15	GS20
29339	MLG184	Biskri Ac1	GS9	GS14	GS13	GS8	GS15	GS14	GS15	GS20
14773	MLG185	Biskri Ac1	GS9	GS14	GS13	GS8	GS15	GS14	GS15	GS20
14783	MLG186	Biskri Ac1	GS9	GS14	GS13	GS8	GS15	GS14	GS15	GS20
29562	MLG187	Biskri Ac1	GS9	GS14	GS13	GS8	GS15	GS14	GS15	GS20
29567	MLG188	Biskri Ac1	GS9	GS14	GS13	GS8	GS15	GS14	GS15	GS20
16114	MLG189	Biskri Ac1	GS9	GS14	GS13	GS8	GS15	GS14	GS15	GS20
14841	MLG190	Biskri Ac1	GS9	GS14	GS13	GS8	GS15	GS14	GS15	GS20
14797	MLG191	Biskri Ac1	GS9	GS14	GS13	GS8	GS15	GS14	GS15	GS20
16105	MLG192	Biskri Ac1	GS9	GS14	GS13	GS8	GS15	GS14	GS15	GS20
16106	MLG192	Biskri Ac1	GS9	GS14	GS13	GS8	GS15	GS14	GS15	GS20
29566	MLG193	Biskri Ac1	GS9	GS14	GS13	GS8	GS15	GS14	GS15	GS20
14839	MLG194	Biskri Ac1	GS9	GS14	GS13	GS8	GS15	GS14	GS15	GS20
14956	MLG195	Biskri Ac1	GS9	GS14	GS13	GS8	GS15	GS14	GS15	GS20
14780	MLG196	Biskri Ac1	GS9	GS14	GS13	GS8	GS15	GS14	GS15	GS20
16113	MLG197	Biskri Ac1	GS9	GS14	GS13	GS8	GS15	GS14	GS15	GS20
14846	MLG198	Biskri Ac1	GS9	GS14	GS13	GS8	GS15	GS14	GS15	GS20
14792	MLG199	Biskri Ac1	GS9	GS14	GS13	GS8	GS15	GS14	GS15	GS20
15102	MLG2	Biskri Ac1	Admix	Admix	Admix	Admix	Admix	Admix	Admix	Admix
29575	MLG200	Biskri Ac1	Admix	Admix	Admix	Admix	Admix	Admix	Admix	Admix
29576	MLG201	Biskri Ac1	Admix	Admix	Admix	Admix	Admix	Admix	Admix	Admix
16184	MLG202	Biskri Ac1	GS9	GS14	GS13	GS8	GS15	GS14	GS15	GS20
15107	MLG3	Biskri Ac1	Admix	Admix	Admix	Admix	Admix	Admix	Admix	Admix
29477	MLG315	Biskri Ac1	Admix	Admix	Admix	Admix	Admix	Admix	Admix	Admix
16024	MLG97	Biskri Ac1	Admix	Admix	Admix	Admix	Admix	Admix	Admix	Admix
28671	MLG138	Biskri glabre	Admix	Admix	Admix	Admix	Admix	Admix	Admix	Admix
28720	MLG139	Biskri glabre	GS12	GS6	GS6	GS12	GS17	GS8	GS13	GS12
28682	MLG140	Biskri glabre	GS12	GS6	GS6	GS12	GS17	GS8	GS13	GS12
28721	MLG141	Biskri glabre	GS12	GS6	GS6	GS12	GS17	GS8	GS13	GS12
28746	MLG142	Biskri glabre	GS12	GS6	GS6	GS12	GS17	GS8	GS13	GS12
28759	MLG143	Biskri glabre	GS12	GS6	GS6	GS12	GS17	GS8	GS13	GS12
28752	MLG144	Biskri glabre	GS12	GS6	GS6	GS12	GS17	GS8	GS13	GS12
28694	MLG145	Biskri glabre	GS12	GS6	GS6	GS12	GS17	GS8	GS13	GS12
28709	MLG146	Biskri glabre	GS12	GS6	GS6	GS12	GS17	GS8	GS13	GS12
28760	MLG147	Biskri glabre	GS12	GS6	GS6	GS12	GS17	GS8	GS13	GS12
28733	MLG148	Biskri glabre	GS12	GS6	GS6	GS12	GS17	GS8	GS13	GS12
28732	MLG155	Biskri glabre	Admix	Admix	Admix	Admix	Admix	Admix	Admix	Admix
16211	MLG133	Jneh Khotifa (193)	GS10	GS1	GS3	GS7	GS7	GS12	GS7	GS17
16206	MLG134	Jneh Khotifa (193)	GS10	GS1	GS3	GS7	GS7	GS12	GS7	GS17
16194	MLG135	Jneh Khotifa (193)	GS10	GS1	GS3	GS7	GS7	GS12	GS7	GS17
14842	MLG136	Jneh Khotifa (193)	GS10	GS1	GS3	GS7	GS7	GS12	GS7	GS17
14843	MLG137	Jneh Khotifa (193)	GS10	GS1	GS3	GS7	GS7	GS12	GS7	GS17
16216	MLG150	Jneh Khotifa (193)	Admix	Admix	Admix	Admix	Admix	Admix	Admix	Admix
16185	MLG151	Jneh Khotifa (193)	Admix	Admix	Admix	Admix	Admix	Admix	Admix	Admix
16207	MLG152	Jneh Khotifa (193)	Admix	Admix	Admix	Admix	Admix	Admix	Admix	Admix
16186	MLG153	Jneh Khotifa (193)	Admix	Admix	Admix	Admix	Admix	Admix	Admix	Admix
16193	MLG154	Jneh Khotifa (193)	GS10	GS1	GS3	Admix	Admix	Admix	Admix	Admix
16215	MLG160	Jneh Khotifa (193)	Admix	Admix	Admix	Admix	Admix	Admix	Admix	GS6
16217	MLG161	Jneh Khotifa (193)	Admix	Admix	Admix	Admix	Admix	Admix	Admix	GS6
16214	MLG162	Jneh Khotifa (193)	Admix	Admix	Admix	Admix	Admix	Admix	Admix	GS6
14844	MLG268	Jneh Khotifa (193)	Admix	Admix	Admix	Admix	Admix	Admix	Admix	Admix
14845	MLG268	Jneh Khotifa (193)	Admix	Admix	Admix	Admix	Admix	Admix	Admix	Admix
16066	MLG177	Mahmoudi (122)	Admix	Admix	Admix	Admix	Admix	Admix	Admix	Admix
16058	MLG206	Mahmoudi (122)	Admix	Admix	Admix	Admix	Admix	Admix	Admix	Admix
29072	MLG223	Mahmoudi (122)	GS7	GS13	GS7	GS4	GS2	GS13	GS1	GS13
29115	MLG224	Mahmoudi (122)	GS7	GS13	GS7	GS4	GS2	GS13	GS1	GS13
15546	MLG225	Mahmoudi (122)	GS7	GS13	GS7	GS4	GS2	GS13	GS1	GS13
15591	MLG226	Mahmoudi (122)	GS7	GS13	GS7	GS4	GS2	GS13	GS1	GS13
29065	MLG227	Mahmoudi (122)	GS7	GS13	GS7	GS4	GS2	GS13	GS1	GS13
29152	MLG227	Mahmoudi (122)	GS7	GS13	GS7	GS4	GS2	GS13	GS1	GS13
15441	MLG227	Mahmoudi (122)	GS7	GS13	GS7	GS4	GS2	GS13	GS1	GS13
15564	MLG227	Mahmoudi (122)	GS7	GS13	GS7	GS4	GS2	GS13	GS1	GS13
15576	MLG227	Mahmoudi (122)	GS7	GS13	GS7	GS4	GS2	GS13	GS1	GS13
15929	MLG227	Mahmoudi (122)	GS7	GS13	GS7	GS4	GS2	GS13	GS1	GS13
15942	MLG227	Mahmoudi (122)	GS7	GS13	GS7	GS4	GS2	GS13	GS1	GS13
15971	MLG227	Mahmoudi (122)	GS7	GS13	GS7	GS4	GS2	GS13	GS1	GS13
16160	MLG227	Mahmoudi (122)	GS7	GS13	GS7	GS4	GS2	GS13	GS1	GS13
29040	MLG227	Mahmoudi (122)	GS7	GS13	GS7	GS4	GS2	GS13	GS1	GS13
29082	MLG227	Mahmoudi (122)	GS7	GS13	GS7	GS4	GS2	GS13	GS1	GS13
29091	MLG227	Mahmoudi (122)	GS7	GS13	GS7	GS4	GS2	GS13	GS1	GS13
29103	MLG227	Mahmoudi (122)	GS7	GS13	GS7	GS4	GS2	GS13	GS1	GS13
29107	MLG227	Mahmoudi (122)	GS7	GS13	GS7	GS4	GS2	GS13	GS1	GS13
29554	MLG227	Mahmoudi (122)	GS7	GS13	GS7	GS4	GS2	GS13	GS1	GS13
29561	MLG227	Mahmoudi (122)	GS7	GS13	GS7	GS4	GS2	GS13	GS1	GS13
15529	MLG228	Mahmoudi (122)	GS7	GS13	GS7	GS4	GS2	GS13	GS1	GS13
29139	MLG229	Mahmoudi (122)	GS7	GS13	GS7	GS4	GS2	GS13	GS1	GS13
29123	MLG230	Mahmoudi (122)	GS7	GS13	GS7	GS4	GS2	GS13	GS1	GS13
29148	MLG231	Mahmoudi (122)	GS7	GS13	GS7	GS4	GS2	GS13	GS1	GS13
29109	MLG232	Mahmoudi (122)	GS7	GS13	GS7	GS4	GS2	GS13	GS1	GS13
15533	MLG233	Mahmoudi (122)	GS7	GS13	GS7	GS4	GS2	GS13	GS1	GS13
29208	MLG233	Mahmoudi (122)	GS7	GS13	GS7	GS4	GS2	GS13	GS1	GS13
29231	MLG233	Mahmoudi (122)	GS7	GS13	GS7	GS4	GS2	GS13	GS1	GS13
29404	MLG233	Mahmoudi (122)	GS7	GS13	GS7	GS4	GS2	GS13	GS1	GS13
29479	MLG233	Mahmoudi (122)	GS7	GS13	GS7	GS4	GS2	GS13	GS1	GS13
29522	MLG233	Mahmoudi (122)	GS7	GS13	GS7	GS4	GS2	GS13	GS1	GS13
29531	MLG233	Mahmoudi (122)	GS7	GS13	GS7	GS4	GS2	GS13	GS1	GS13
29542	MLG233	Mahmoudi (122)	GS7	GS13	GS7	GS4	GS2	GS13	GS1	GS13
16181	MLG234	Mahmoudi (122)	GS7	GS13	GS7	GS4	GS2	GS13	GS1	GS13
29037	MLG234	Mahmoudi (122)	GS7	GS13	GS7	GS4	GS2	GS13	GS1	GS13
29043	MLG234	Mahmoudi (122)	GS7	GS13	GS7	GS4	GS2	GS13	GS1	GS13
29049	MLG234	Mahmoudi (122)	GS7	GS13	GS7	GS4	GS2	GS13	GS1	GS13
29122	MLG234	Mahmoudi (122)	GS7	GS13	GS7	GS4	GS2	GS13	GS1	GS13
29494	MLG235	Mahmoudi (122)	GS7	GS13	GS7	GS4	GS2	GS13	GS1	GS13
29571	MLG236	Mahmoudi (122)	GS7	GS13	GS7	GS4	GS2	GS13	GS1	GS13
15643	MLG237	Mahmoudi (122)	GS7	GS13	GS7	GS4	GS2	GS13	GS1	GS13
29131	MLG238	Mahmoudi (122)	GS7	GS13	GS7	GS4	GS2	GS13	GS1	GS13
16182	MLG239	Mahmoudi (122)	GS7	GS13	GS7	GS4	GS2	GS13	GS1	GS13
29565	MLG240	Mahmoudi (122)	GS7	GS13	GS7	GS4	GS2	GS13	GS1	GS13
16154	MLG241	Mahmoudi (122)	GS7	GS13	GS7	GS4	GS2	GS13	GS1	GS13
16155	MLG242	Mahmoudi (122)	GS7	GS13	GS7	GS4	GS2	GS13	GS1	GS13
29478	MLG243	Mahmoudi (122)	GS7	GS13	GS7	GS4	GS2	GS13	GS1	GS13
16180	MLG244	Mahmoudi (122)	GS7	GS13	GS7	GS4	GS2	GS13	GS1	GS13
29512	MLG245	Mahmoudi (122)	GS7	GS13	GS7	GS4	GS2	GS13	GS1	GS13
15537	MLG246	Mahmoudi (122)	GS7	GS13	GS7	GS4	GS2	GS13	GS1	GS13
28747	MLG247	Mahmoudi (122)	GS7	GS13	GS7	GS4	GS2	GS13	GS1	GS13
29081	MLG248	Mahmoudi (122)	GS7	GS13	GS7	GS4	GS2	GS13	GS1	GS13
29073	MLG249	Mahmoudi (122)	GS7	GS13	GS7	GS4	GS2	GS13	GS1	GS13
16183	MLG250	Mahmoudi (122)	GS7	GS13	GS7	GS4	GS2	GS13	GS1	GS13
15534	MLG251	Mahmoudi (122)	GS7	GS13	GS7	GS4	GS2	GS13	GS1	GS13
29042	MLG252	Mahmoudi (122)	GS7	GS13	GS7	GS4	GS2	GS13	GS1	GS13
29706	MLG253	Mahmoudi (122)	GS7	GS13	GS7	GS4	GS2	GS13	GS1	GS13
15590	MLG254	Mahmoudi (122)	GS7	GS13	GS7	GS4	GS2	GS13	GS1	GS13
29114	MLG255	Mahmoudi (122)	GS7	GS13	GS7	GS4	GS2	GS13	GS1	GS13
29574	MLG256	Mahmoudi (122)	GS7	GS13	GS7	GS4	GS2	GS13	GS1	GS13
29147	MLG257	Mahmoudi (122)	GS7	GS13	GS7	GS4	GS2	GS13	GS1	GS13
29140	MLG258	Mahmoudi (122)	GS7	GS13	GS7	GS4	GS2	GS13	GS1	GS13
16161	MLG259	Mahmoudi (122)	GS7	GS13	GS7	GS4	GS2	GS13	GS1	GS13
29108	MLG260	Mahmoudi (122)	GS7	GS13	GS7	GS4	GS2	GS13	GS1	GS13
15587	MLG261	Mahmoudi (122)	GS7	GS13	GS7	GS4	GS2	GS13	GS1	GS13
15555	MLG262	Mahmoudi (122)	GS7	GS13	GS7	GS4	GS2	GS13	GS1	GS13
16178	MLG262	Mahmoudi (122)	GS7	GS13	GS7	GS4	GS2	GS13	GS1	GS13
29703	MLG263	Mahmoudi (122)	GS7	GS13	GS7	GS4	GS2	GS13	GS1	GS13
16176	MLG264	Mahmoudi (122)	GS7	GS13	GS7	GS4	GS2	GS13	GS1	GS13
28600	MLG265	Mahmoudi (122)	GS7	GS13	GS7	GS4	GS2	GS13	GS1	GS13
29403	MLG266	Mahmoudi (122)	GS7	GS13	GS7	GS4	GS2	GS13	GS1	GS13
29057	MLG267	Mahmoudi (122)	GS7	GS13	GS7	GS4	GS2	GS13	GS1	GS13
16168	MLG269	Mahmoudi (122)	GS7	GS13	GS7	GS4	GS2	GS13	GS1	GS13
29572	MLG286	Mahmoudi (122)	GS7	GS13	GS7	GS4	GS2	GS13	GS1	GS13
15524	MLG98	Mahmoudi (122)	Admix	Admix	Admix	Admix	Admix	Admix	Admix	Admix
16065	MLG178	Mahmoudi (986)	Admix	Admix	Admix	Admix	Admix	Admix	Admix	Admix
29268	MLG272	Mahmoudi (986)	GS1	GS9	GS5	GS1	GS16	GS7	GS19	GS9
29269	MLG273	Mahmoudi (986)	GS1	GS9	GS5	GS1	GS16	GS7	GS19	GS9
28601	MLG274	Mahmoudi (986)	GS1	GS9	GS5	GS1	GS16	GS7	GS19	GS9
28615	MLG275	Mahmoudi (986)	GS1	GS9	GS5	GS1	GS16	GS7	GS19	GS9
15966	MLG276	Mahmoudi (986)	GS1	GS9	GS5	GS1	GS16	GS7	GS19	GS9
29215	MLG277	Mahmoudi (986)	GS1	GS9	GS5	GS1	GS16	GS7	GS19	GS9
28772	MLG278	Mahmoudi (986)	GS1	GS9	GS5	GS1	GS16	GS7	GS19	GS9
15928	MLG279	Mahmoudi (986)	GS1	GS9	GS5	GS1	GS16	GS7	GS19	GS9
15965	MLG280	Mahmoudi (986)	GS1	GS9	GS5	GS1	GS16	GS7	GS19	GS9
14864	MLG281	Mahmoudi (986)	GS1	GS9	GS5	GS1	GS16	GS7	GS19	GS9
29213	MLG282	Mahmoudi (986)	GS1	GS9	GS5	GS1	GS16	GS7	GS19	GS9
15972	MLG283	Mahmoudi (986)	GS1	GS9	GS5	GS1	GS16	GS7	GS19	GS9
15974	MLG284	Mahmoudi (986)	GS1	GS9	GS5	GS1	GS16	GS7	GS19	GS9
14957	MLG285	Mahmoudi (986)	GS1	GS9	GS5	GS1	GS16	GS7	GS19	GS9
49609	MLG287	Mahmoudi (986)	Admix	Admix	Admix	Admix	Admix	Admix	Admix	Admix
28776	MLG10	Mekki (121/198)	GS11	GS4	GS1	GS2	GS1	GS1	GS5	GS3
29735	MLG102	Mekki (121/198)	GS11	GS4	GS1	GS2	GS1	GS1	GS5	GS3
29502	MLG11	Mekki (121/198)	GS11	GS4	GS1	GS2	GS1	GS1	GS5	GS3
29726	MLG12	Mekki (121/198)	GS11	GS4	GS1	GS2	GS1	GS1	GS5	GS3
29458	MLG13	Mekki (121/198)	GS11	GS4	GS1	GS2	GS1	GS1	GS5	GS3
29457	MLG14	Mekki (121/198)	GS11	GS4	GS1	GS2	GS1	GS1	GS5	GS3
29443	MLG15	Mekki (121/198)	GS11	GS4	GS1	GS2	GS1	GS1	GS5	GS3
29476	MLG15	Mekki (121/198)	GS11	GS4	GS1	GS2	GS1	GS1	GS5	GS3
29474	MLG16	Mekki (121/198)	GS11	GS4	GS1	GS2	GS1	GS1	GS5	GS3
29466	MLG17	Mekki (121/198)	GS11	GS4	GS1	GS2	GS1	GS1	GS5	GS3
28988	MLG18	Mekki (121/198)	GS11	GS4	GS1	GS2	GS1	GS1	GS5	GS3
28995	MLG18	Mekki (121/198)	GS11	GS4	GS1	GS2	GS1	GS1	GS5	GS3
29450	MLG18	Mekki (121/198)	GS11	GS4	GS1	GS2	GS1	GS1	GS5	GS3
28973	MLG19	Mekki (121/198)	GS11	GS4	GS1	GS2	GS1	GS1	GS5	GS3
29449	MLG20	Mekki (121/198)	GS11	GS4	GS1	GS2	GS1	GS1	GS5	GS3
28777	MLG21	Mekki (121/198)	GS11	GS4	GS1	GS2	GS1	GS1	GS5	GS3
28778	MLG22	Mekki (121/198)	GS11	GS4	GS1	GS2	GS1	GS1	GS5	GS3
28791	MLG23	Mekki (121/198)	GS11	GS4	GS1	GS2	GS1	GS1	GS5	GS3
29005	MLG24	Mekki (121/198)	GS11	GS4	GS1	GS2	GS1	GS1	GS5	GS3
28989	MLG25	Mekki (121/198)	GS11	GS4	GS1	GS2	GS1	GS1	GS5	GS3
29016	MLG25	Mekki (121/198)	GS11	GS4	GS1	GS2	GS1	GS1	GS5	GS3
29025	MLG26	Mekki (121/198)	GS11	GS4	GS1	GS2	GS1	GS1	GS5	GS3
29017	MLG27	Mekki (121/198)	GS11	GS4	GS1	GS2	GS1	GS1	GS5	GS3
29727	MLG87	Mekki (121/198)	GS11	GS4	GS1	GS2	GS1	GS1	GS5	GS3
29130	MLG88	Mekki (121/198)	GS11	GS4	GS1	GS2	GS1	GS1	GS5	GS3
29736	MLG89	Mekki (121/198)	Admix	Admix	Admix	Admix	Admix	Admix	Admix	Admix
29715	MLG9	Mekki (121/198)	GS11	GS4	GS1	GS2	GS1	GS1	GS5	GS3
29756	MLG90	Mekki (121/198)	Admix	Admix	Admix	Admix	Admix	Admix	Admix	Admix
99992	MLG120	Modern	GS12	GS10	GS10	GS10	GS3	GS9	GS11	GS19
99993	MLG159	Modern	Admix	Admix	Admix	Admix	GS14	Admix	Admix	GS5
99995	MLG165	Modern	Admix	Admix	Admix	Admix	GS14	GS3	GS16	GS5
99996	MLG169	Modern	Admix	Admix	Admix	Admix	GS14	Admix	Admix	GS5
99994	MLG216	Modern	GS8	GS11	GS2	GS6	GS4	GS11	GS17	GS10
99991	MLG44	Modern	GS12	GS10	GS10	GS10	GS3	GS9	GS11	GS19
16095	MLG271	Richi	Admix	Admix	Admix	Admix	Admix	Admix	Admix	Admix
16087	MLG288	Richi	GS5	GS7	GS9	GS15	GS5	GS2	GS3	GS18
16092	MLG289	Richi	GS5	GS7	GS9	GS15	GS5	GS2	GS3	GS18
16088	MLG290	Richi	GS5	GS7	GS9	GS15	GS5	GS2	GS3	GS18
16091	MLG291	Richi	GS5	GS7	GS9	GS15	GS5	GS2	GS3	GS18
16096	MLG292	Richi	GS5	GS7	GS9	GS15	GS5	GS2	GS3	GS18
16100	MLG293	Richi	GS5	GS7	GS9	GS15	GS5	GS2	GS3	GS18
16104	MLG294	Richi	GS5	GS7	GS9	GS15	GS5	GS2	GS3	GS18
16103	MLG295	Richi	GS5	GS7	GS9	GS15	GS5	GS2	GS3	GS18
15915	MLG56	Richi	Admix	Admix	Admix	Admix	Admix	Admix	Admix	GS7
15973	MLG94	Richi	Admix	Admix	Admix	Admix	Admix	Admix	Admix	GS7
29745	MLG158	Roussia (975)	Admix	Admix	Admix	Admix	GS14	Admix	Admix	GS5
29207	MLG166	Roussia (975)	Admix	Admix	Admix	Admix	GS14	Admix	Admix	GS5
15729	MLG166	Roussia (975)	Admix	Admix	Admix	Admix	GS14	Admix	Admix	GS5
15733	MLG166	Roussia (975)	Admix	Admix	Admix	Admix	GS14	Admix	Admix	GS5
15734	MLG166	Roussia (975)	Admix	Admix	Admix	Admix	GS14	Admix	Admix	GS5
29251	MLG217	Roussia (975)	GS8	GS11	GS2	GS6	GS4	GS11	GS17	GS10
28651	MLG218	Roussia (975)	GS8	GS11	GS2	GS6	GS4	GS11	GS17	GS10
28590	MLG219	Roussia (975)	GS8	GS11	GS2	GS6	GS4	GS11	GS17	GS10
29442	MLG220	Roussia (975)	GS8	GS11	GS2	GS6	GS4	GS11	GS17	GS10
49661	MLG296	Roussia (975)	Admix	Admix	Admix	Admix	Admix	Admix	Admix	Admix
16179	MLG215	Sbei Glabre Ac1	Admix	Admix	Admix	Admix	Admix	Admix	Admix	Admix
29588	MLG73	Sbei Glabre Ac1	GS2	GS12	GS8	GS13	GS10	GS16	GS9	GS16
49624	MLG74	Sbei Glabre Ac1	GS2	GS12	GS8	GS13	GS10	GS16	GS9	GS16
49653	MLG74	Sbei Glabre Ac1	GS2	GS12	GS8	GS13	GS10	GS16	GS9	GS16
49654	MLG74	Sbei Glabre Ac1	GS2	GS12	GS8	GS13	GS10	GS16	GS9	GS16
29714	MLG74	Sbei Glabre Ac1	GS2	GS12	GS8	GS13	GS10	GS16	GS9	GS16
49630	MLG75	Sbei Glabre Ac1	GS2	GS12	GS8	GS13	GS10	GS16	GS9	GS16
49675	MLG76	Sbei Glabre Ac1	GS2	GS12	GS8	GS13	GS10	GS16	GS9	GS16
49633	MLG77	Sbei Glabre Ac1	GS2	GS12	GS8	GS13	GS10	GS16	GS9	GS16
29702	MLG78	Sbei Glabre Ac1	GS2	GS12	GS8	GS13	GS10	GS16	GS9	GS16
49681	MLG79	Sbei Glabre Ac1	GS2	GS12	GS8	GS13	GS10	GS16	GS9	GS16
49668	MLG80	Sbei Glabre Ac1	GS2	GS12	GS8	GS13	GS10	GS16	GS9	GS16
29700	MLG81	Sbei Glabre Ac1	GS2	GS12	GS8	GS13	GS10	GS16	GS9	GS16
29599	MLG82	Sbei Glabre Ac1	GS2	GS12	GS8	GS13	GS10	GS16	GS9	GS16
49641	MLG83	Sbei Glabre Ac1	GS2	GS12	GS8	GS13	GS10	GS16	GS9	GS16
29591	MLG84	Sbei Glabre Ac1	GS2	GS12	GS8	GS13	GS10	GS16	GS9	GS16
29589	MLG85	Sbei Glabre Ac1	GS2	GS12	GS8	GS13	GS10	GS16	GS9	GS16
49617	MLG86	Sbei Glabre Ac1	GS2	GS12	GS8	GS13	GS10	GS16	GS9	GS16
29590	MLG91	Sbei Glabre Ac1	Admix	Admix	Admix	Admix	Admix	Admix	Admix	Admix
16210	MLG163	Souri	Admix	Admix	Admix	Admix	GS14	GS3	GS16	GS5
28708	MLG164	Souri	Admix	Admix	Admix	Admix	GS14	GS3	GS16	GS5
15732	MLG167	Souri	Admix	Admix	Admix	Admix	GS14	Admix	Admix	GS5
15730	MLG168	Souri	Admix	Admix	Admix	Admix	GS14	Admix	Admix	GS5
29386	MLG170	Souri	Admix	Admix	GS15	GS5	Admix	GS4	GS14	Admix
29400	MLG171	Souri	GS8	GS11	GS15	GS5	GS11	GS4	GS14	GS2
29396	MLG172	Souri	GS8	GS11	GS15	GS5	GS11	GS4	GS14	GS2
29370	MLG173	Souri	GS8	GS11	GS15	GS5	GS11	GS4	GS14	GS2
29379	MLG174	Souri	GS8	GS11	GS15	GS5	GS11	GS4	GS14	GS2
16081	MLG204	Taganrog (120)	Admix	GS2	GS14	GS3	GS9	GS10	GS4	GS15
16084	MLG205	Taganrog (120)	Admix	Admix	Admix	Admix	Admix	Admix	Admix	Admix
15169	MLG207	Taganrog (120)	Admix	Admix	Admix	Admix	Admix	Admix	Admix	Admix
49687	MLG208	Taganrog (120)	Admix	Admix	Admix	Admix	Admix	Admix	Admix	Admix
16073	MLG209	Taganrog (120)	Admix	GS2	GS14	GS3	GS9	GS10	GS4	GS15
16074	MLG210	Taganrog (120)	Admix	GS2	GS14	GS3	GS9	GS10	GS4	GS15
16078	MLG211	Taganrog (120)	Admix	GS2	GS14	GS3	GS9	GS10	GS4	GS15
16085	MLG212	Taganrog (120)	Admix	GS2	GS14	GS3	GS9	GS10	GS4	GS15
15954	MLG213	Taganrog (120)	Admix	Admix	Admix	Admix	Admix	Admix	Admix	Admix
49625	MLG92	Taganrog (120)	Admix	Admix	Admix	Admix	Admix	Admix	Admix	Admix
49629	MLG93	Taganrog (120)	Admix	Admix	Admix	Admix	Admix	Admix	Admix	Admix

## Sheet: Figure S1
Figure S1. STRUCTURE membership coefficient bar plot displaying genetic structure of the 366 Tunisian durum wheat genotypes at K=15
